# Supplementary material for: Genetic Characterization and Variation of African Swine Fever Virus China/GD/2019 Strain in Domestic Pigs
Source: Pathogens. 2022 Jan 14;11(1):97. doi: 10.3390/pathogens11010097 (PMC8780551; doi:10.3390/pathogens11010097)
Supplement: Supplementary file 1 [file pathogens-11-00097-s001.zip]

Archive with 4 entries (4 files):
- Supplementary Files/Supplementary Figure S1.pdf
- Supplementary Files/Supplementary Table S1.xls
- Supplementary Files/Supplementary Table S2.xls
- Supplementary Files/Supplementary Table S3.xls
