# Supplementary material for: Genetic Characterization and Variation of African Swine Fever Virus China/GD/2019 Strain in Domestic Pigs
Source: Pathogens. 2022 Jan 14;11(1):97. doi: 10.3390/pathogens11010097 (PMC8780551; doi:10.3390/pathogens11010097)
Supplement: Supplementary file 1 [file pathogens-11-00097-s001.zip › Supplementary Files/Supplementary Table S1.xls]

## Sheet: core_gene
Supplementary Table S1. ORFs identity of core genes, dispensable genes and pan genes of 28 ASFV strains with China/GD/2019
ASFV strains name
	Benin 97/1 (AM712239)	Portugal/OURT88/3 (AM712240)	Malawi/tick/Lil-20/1/1983(AY261361)	SA/Pretorisuskop/96/4(AY261363)	Malawi/Tengani 62(AY261364)	Spain/E75(FN557520)	Georgia 2007/1(FR682468)	Russia/Kashino_04/13(KJ747406)	Kenya/Ken06.Bus(KM111295)	Portugal/L60(KM262844)	Portugal/NHV/1968(KM262845)	Spain/BA71 (KP055815)	Russia/Odintsovo_02/14 (KP843857)	Italy/47/Ss/2008 (KX354450)	Belgium_2018/1 (LR536725)	Estonia 2014 (LS478113)	Pol16_20186_o7(MG939583)	Pol16_29413_o23(MG939586)	Pol17_05838_C220(MG939589)	Uganda/R35/2015 (MH025920)	POL/2015/Podlaskie (MH681419)	China/2018/SY-18 (MH766894)	Georgia_2008/1(MH910495)	Georgia_2008/2(MH910496)	China/2018/AnhuiXCGQ(MK128995)	China/Pig/HLJ/2018(MK333180)	China/DB/LN/2018(MK333181)	China/GD/2019(MW361944)	Spain/BA71V(NC_001659)
ORFs	ORFs identity
CP2475L	97.78	97.82	93.78	94.42	100	97.78	94.83	94.83	91.6	97.78	97.82	97.82	94.83	97.78	94.83	94.83	94.83	94.83	94.59	91.6	94.83	94.75	94.39	94.83	94.83	94.83	94.83	94.69	97.82
NP1450L	100	100	99.1	99.38	99.52	99.39	99.72	99.72	99.03	100	100	100	99.72	100	99.72	99.72	99.72	99.72	99.72	99.03	99.72	99.72	99.72	99.72	99.72	99.72	99.72	99.72	99.93
G1340L	100	99.93	97.31	98.81	98.66	97.38	99.25	99.25	96.04	99.93	99.93	99.93	99.25	99.93	99.25	99.25	99.25	99.25	99.25	96.12	99.25	99.25	98.66	99.25	99.25	99.25	99.25	99.25	99.93
M1249L	96.96	97.04	97.2	96.96	97.12	96.93	96.88	96.88	100	97.02	97.04	96.96	96.84	96.96	96.88	96.88	96.88	96.88	96.88	99.76	96.88	96.88	96.88	96.88	96.88	96.88	96.88	96.88	96.96
EP1242L	100	99.92	99.03	99.6	99.68	99.92	99.6	99.6	99.03	99.92	99.92	99.92	99.6	99.84	99.6	99.6	99.6	99.6	99.6	98.87	99.6	99.6	99.6	99.6	99.6	99.6	99.6	99.6	99.84
G1211R	100	100	96.68	98.5	98.42	100	98.67	98.53	96.68	100	100	100	99.41	100	98.67	98.67	98.67	98.67	98.67	96.68	98.67	98.67	98.67	98.67	98.67	98.67	98.67	98.34	99.92
D1133L	100	100	97.36	99.56	98.88	100	99.91	99.91	97.27	100	100	100	99.91	100	99.91	99.91	99.91	99.91	99.91	97.27	99.91	99.91	99.65	99.91	99.91	99.71	99.71	99.91	100
F1055L	94.6	94.5	100	95.15	92.09	94.32	95.42	95.42	95.52	94.6	94.5	94.6	95.42	94.6	95.42	95.42	95.42	95.42	95.42	95.23	95.32	95.42	95.42	95.42	95.42	95.42	95.42	95.42	94.6
B962L	97.05	97.05	100	96.99	96.52	97.05	96.88	96.88	94.91	97.09	97.05	97.09	96.84	97.09	96.88	96.88	96.88	96.88	96.88	94.91	96.88	96.73	96.88	96.88	96.88	96.88	96.88	96.84	96.94
C962R	100	99.9	98.02	98.65	98.54	100	99.06	99.06	97.4	100	100	100	99.06	100	99.06	99.06	99.06	99.06	99.06	97.4	99.06	99.06	99.06	99.06	99.06	99.06	99.06	99.06	100
A859L	100	100	97.56	99.07	98.72	100	99.18	99.18	95.81	100	100	100	99.18	100	99.18	99.07	99.18	99.18	99.18	95.46	99.18	96.5	99.18	99.18	99.18	99.18	99.18	99.18	100
F778R	94.34	94.47	94.74	93.7	94.34	94.47	94.73	94.73	100	94.47	94.47	94.47	94.73	94.22	94.73	94.73	94.73	94.73	94.73	99.87	94.73	94.73	94.6	94.73	94.73	94.73	94.73	94.73	94.47
C717R	100	100	98.74	99.72	99.86	100	100	100	98.61	100	100	100	100	99.86	100	100	100	100	100	98.33	100	100	100	100	100	100	100	100	100
Q706L	100	100	98.3	99.43	99.29	100	99.86	99.86	98.02	100	100	100	99.86	100	99.86	99.86	99.86	99.86	99.86	98.02	99.86	99.86	99.86	99.86	99.86	99.86	99.86	99.86	100
B646L	100	100	98.3	99.54	99.54	100	99.54	99.54	97.99	100	100	100	99.54	100	99.54	99.54	99.54	99.54	99.54	97.99	99.54	99.54	99.54	99.54	99.54	99.54	99.54	99.54	100
MGF505-11L	87.27	86.72	87.27	86.35	86.72	87.27	87.27	87.27	100	87.27	86.72	87.27	87.27	87.27	87.27	87.27	87.27	87.27	87.27	100	87.27	87.27	87.08	87.27	87.27	87.27	87.27	87.27	87.27
MGF505-9R	100	99.81	86.55	95.17	89.54	99.82	90.86	90.86	83.52	99.81	99.81	99.81	90.86	99.81	90.86	90.86	90.86	90.86	79.51	83.71	90.86	90.86	90.86	90.86	90.86	90.86	90.86	79.28	94.32
MGF505-10R	94.28	94.46	52.96	100	97.61	51.58	96.49	96.31	53.25	94.46	94.46	94.46	96.49	94.1	96.49	96.49	96.49	96.49	96.49	53.25	96.49	96.49	96.49	96.31	96.49	96.49	96.49	96.49	94.46
CP530R	97.17	97.36	97.92	97.55	97.55	97.36	97.55	97.55	100	97.55	97.36	97.36	97.55	97.36	97.55	97.55	97.55	97.55	97.55	99.81	97.55	97.55	97.55	97.55	97.55	97.55	97.55	97.55	97.36
MGF505-5R	88.55	88.55	100	88.82	86.14	88.63	88.15	87.95	81.52	88.55	88.55	88.55	88.15	88.55	88.15	88.15	88.15	88.15	88.15	81.52	88.15	88.15	88.15	88.15	88.15	88.15	88.15	88.15	88.55
QP509L	99.02	99.02	96.46	100	98.23	99.02	98.62	98.62	96.07	99.02	99.02	99.02	98.62	99.02	98.62	98.62	98.62	98.62	98.62	96.07	98.62	98.62	98.62	98.62	98.62	98.62	98.62	98.62	99.02
B475L	96.63	96.63	87.04	100	97.25	96.63	96	96	88.16	96.63	96.63	96.63	96	96.63	96	96	96	96	96	88.16	96	96	96	96	96	96	96	96	96.63
C475L	100	100	96.42	98.32	97.89	100	99.58	99.58	94.53	100	100	100	99.58	100	99.58	99.58	99.58	99.58	99.58	94.32	99.58	99.58	99.58	99.58	99.58	99.58	99.58	99.58	100
M448R	100	100	93.05	98.66	99.11	100	98.44	98.44	92.41	100	100	100	98.86	99.55	98.44	98.44	98.44	98.44	98.44	92.63	98.44	98.44	98.44	98.44	98.44	98.44	98.44	98.44	100
EP424R	100	100	98.11	97.88	97.87	100	98.09	98.09	96.23	100	100	100	98.19	100	98.09	98.09	98.09	98.09	98.09	96.23	98.09	98.09	98.09	98.09	98.09	98.09	98.09	98.09	100
E423R	100	100	96.93	99.29	99.05	100	99.53	99.53	94.56	100	100	100	99.53	100	99.53	99.53	99.53	99.53	99.53	94.56	99.53	99.53	99.29	99.53	99.53	99.53	99.53	99.53	100
B407L	88.49	89.81	100	90.78	89.93	90.66	90.29	90.24	75	90.66	89.81	90.66	90.29	90.66	90.29	90.29	90.29	90.29	90.29	75	90.29	90.29	90.29	90.29	90.29	90.29	90.29	90.29	90.66
NP419L	100	100	97.14	98.09	98.33	100	99.28	99.28	95.47	100	100	100	99.05	100	99.05	99.05	99.05	99.05	99.05	95.47	99.28	99.05	99.28	99.28	99.05	99.05	99.05	99.05	100
B385R	100	100	98.7	98.44	98.44	100	100	100	97.92	100	100	100	100	100	100	100	100	100	100	97.92	100	100	99.22	100	100	100	100	100	100
MGF360-18R	70.17	70.17	54.37	100	78.25	72.22	78.93	78.93	54.96	70.17	70.17	70.17	78.93	70.17	78.93	78.93	78.93	78.93	78.93	64.43	78.93	78.93	78.93	78.37	78.93	78.93	78.93	78.93	70.17
H359L	100	100	96.1	98.61	99.16	100	98.89	98.89	94.99	100	100	100	98.89	100	98.89	98.89	98.89	98.89	98.89	94.99	98.89	98.89	98.89	98.89	98.89	98.89	98.89	98.89	100
B354L	100	100	100	99.72	99.72	100	99.72	99.72	99.15	100	100	100	99.6	100	99.72	99.72	99.72	99.72	99.72	99.15	99.72	99.72	99.72	99.72	99.72	99.72	99.72	99.72	100
D345L	100	100	93.04	96.52	97.1	100	99.42	99.42	92.75	100	100	100	99.42	100	99.42	99.42	99.42	99.42	99.42	92.75	99.42	99.42	99.42	99.42	99.42	99.42	99.42	99.42	100
D339L	100	100	97.31	99.12	98.23	100	99.41	99.41	94.93	100	100	100	99.41	100	99.41	99.41	99.41	99.41	99.41	94.93	99.41	99.41	99.41	99.41	99.41	99.41	99.41	99.41	100
H339R	100	100	96.17	98.82	98.82	100	99.71	99.71	97.05	100	100	100	99.71	100	99.71	99.71	99.71	99.71	99.71	96.76	99.71	99.71	99.71	99.71	99.71	99.71	99.71	99.71	100
MGF300-4L	94.82	94.82	87.31	100	93.03	94.82	95.45	95.45	84.55	94.82	94.82	94.82	95.45	94.51	95.45	95.45	95.45	95.45	95.45	84.85	95.45	95.45	95.45	95.45	95.45	95.45	95.45	95.08	94.82
F334L	100	100	98.47	97.86	99.1	100	100	100	96.33	100	100	100	100	100	100	100	100	100	100	96.33	100	100	100	100	100	100	100	100	99.7
MGF360-8L	100	99.69	88.71	94.98	95.61	100	96.24	96.24	86.67	99.69	99.69	99.69	96.24	100	96.24	96.24	96.24	96.24	96.24	86.52	96.24	96.24	94.36	96.24	96.24	96.24	96.24	96.24	99.69
B318L	100	100	96.86	98.43	98.43	100	98.74	98.74	96.54	100	100	100	98.74	100	98.74	98.74	98.74	98.74	98.74	96.23	98.74	98.74	98.74	98.74	98.74	98.74	98.74	98.74	100
F317L	94.64	94.95	100	96.53	95.57	94.95	95.27	95.27	96.2	94.95	94.95	94.95	95.13	94.95	95.27	95.27	95.27	95.27	95.27	96.2	95.27	95.27	95.27	95.27	95.27	95.27	95.27	95.27	94.95
C315R	98.73	98.73	98.41	98.41	98.41	98.73	98.73	98.73	100	98.73	98.73	98.73	98.73	98.73	98.73	98.73	98.73	98.73	98.73	100	98.73	98.73	98.41	98.73	98.73	98.73	98.73	98.73	98.73
CP312R	100	99.67	91.86	95.77	94.46	100	99.67	99.67	90.2	100	99.67	100	99.67	100	99.67	99.67	99.67	99.67	99.67	90.2	99.67	99.67	99.67	99.67	99.67	99.67	99.67	99.67	100
I267L	97	97	94.38	97	100	97	97	97	90.83	97	97	97	83.51	97	96.63	96.63	96.63	96.63	96.63	90.83	97	96.63	97	97	96.63	96.63	96.63	96.63	97
E301R	100	100	99	99.34	99.34	100	99.67	99.67	99.34	100	100	100	99.67	100	99.67	99.67	99.67	99.67	99.67	99.34	99.67	99.67	99.67	99.67	99.67	99.67	99.67	99.67	100
R298L	94.51	92.95	100	94.3	94.3	92.95	93.29	93.29	94.65	92.95	92.95	92.95	93.29	94.51	93.29	93.29	93.29	93.29	93.29	94.98	93.29	93.29	93.29	93.29	93.29	93.29	93.29	93.29	92.95
MGF360-15R	100	100	87.08	96.38	95.5	100	95.16	95.16	86.12	100	100	100	95.16	100	95.16	95.16	95.16	95.16	95.16	85.71	95.16	95.5	95.16	95.16	95.16	95.16	95.16	95.16	100
S273R	100	100	96.34	99.27	99.27	93.27	99.63	99.63	97.07	100	100	100	99.63	100	99.63	99.63	99.63	99.63	99.63	96.34	99.63	99.63	99.63	99.63	99.63	99.63	99.63	99.63	100
MGF300-1L	100	100	92.16	95.15	94.4	100	95.15	95.15	91.42	100	100	100	95.15	100	95.15	95.15	95.15	95.15	95.15	90.67	95.15	95.15	95.15	95.15	95.15	95.15	95.15	95.15	100
B263R	100	100	97.34	98.48	98.86	100	99.62	99.62	96.2	100	100	100	99.62	100	99.62	99.62	99.62	99.62	99.62	96.2	99.62	99.62	99.62	99.62	99.62	99.62	99.62	99.62	100
C257L	100	100	93.77	96.89	97.67	100	99.61	99.61	95.33	100	100	100	99.61	100	99.61	99.61	99.61	99.61	99.61	95.33	99.61	99.61	99.61	99.61	99.61	99.61	99.61	99.61	99.61
D250R	100	100	93.56	99.6	99.2	100	99.6	99.6	93.6	100	100	100	99.6	100	99.6	99.6	99.6	99.6	99.6	93.6	99.6	99.6	99.6	99.6	99.6	99.6	99.6	99.6	99.6
E248R	95.97	95.97	92.8	95.56	95.97	95.97	95.56	95.56	100	95.97	95.97	95.97	95.56	95.97	95.56	95.56	95.56	95.56	95.56	100	95.56	95.56	95.56	95.56	95.56	95.56	95.56	95.56	95.97
I243L	100	99.59	95.85	99.59	99.59	99.59	99.18	99.18	95.88	99.59	99.59	99.59	99.18	99.59	99.18	99.18	99.18	99.18	99.18	96.3	99.18	99.18	99.18	99.18	99.18	99.18	99.18	99.18	99.59
A224L	90.62	90.62	94.12	90.62	90.62	90.62	90.62	90.18	100	90.62	90.62	90.62	90.62	90.62	90.62	90.62	90.62	90.62	90.62	100	90.62	90.62	89.29	90.62	90.62	90.62	90.62	90.62	90.62
H240R	90.83	90.83	100	90.42	90.42	90.83	90.87	90.87	89.21	90.83	90.83	90.83	90.87	90.83	90.87	90.87	90.87	90.87	90.87	89.21	90.46	90.87	87.14	90.87	90.87	90.87	90.87	89.73	90.83
A240L	100	100	81.28	95.82	89.54	100	90.25	90.25	70.45	100	100	100	90.25	100	90.25	90.25	90.25	90.25	90.25	68.51	90.25	90.25	90.25	90.25	90.25	90.25	90.25	90.25	100
H233R	100	100	93.13	97.85	98.71	100	100	100	91.42	100	100	100	100	100	100	100	100	100	100	90.99	100	100	99.57	100	100	100	100	100	100
I215L	90.23	89.77	85.45	100	91.12	90.23	90.09	90.09	86.18	90.23	89.77	90.23	90.09	90.23	90.09	90.09	90.09	90.09	90.09	86.18	90.09	90.09	90.09	90.09	90.09	90.09	90.09	90.09	90.23
K205R	93.66	93.66	100	93.17	91.22	93.66	93.66	93.66	88.04	93.66	93.66	93.66	93.66	93.66	93.66	93.66	93.66	93.66	93.66	88.04	93.66	93.66	93.66	93.66	93.66	93.66	93.66	93.66	93.66
D205R	100	100	97.56	99.02	99.02	100	100	100	94.63	100	100	100	100	99.51	100	100	100	100	100	94.63	100	100	100	100	100	100	100	100	100
CP204L	97.42	96.91	87.5	97.85	96.91	97.42	99.48	100	86.07	97.42	97.55	97.42	100	97.42	99.48	99.48	99.48	99.48	99.48	86.07	99.48	99.48	99.48	99.48	99.48	99.48	99.48	98.48	98.04
E199L	93.37	92.86	94.9	94.9	95.41	93.37	94.39	94.39	100	93.37	92.86	94.39	94.39	93.37	94.39	94.39	93.88	94.39	94.39	100	93.88	94.39	93.88	93.88	94.39	94.39	94.39	94.39	94.39
E184L	100	100	98.91	99.46	98.91	100	99.46	99.46	98.91	100	100	100	99.46	100	99.46	99.46	99.46	98.91	99.46	98.37	99.46	99.46	99.46	99.46	99.46	99.46	99.46	99.46	100
S183L	100	100	92.9	97.81	96.17	100	99.45	99.45	92.9	100	100	100	99.45	100	99.45	99.45	99.45	99.45	99.45	92.9	99.45	99.45	99.45	99.45	99.45	99.45	99.45	99.45	100
A179L	100	99.44	96.09	98.32	98.32	99.44	99.44	99.44	93.85	99.44	99.44	99.44	99.23	99.44	99.44	99.44	99.44	99.44	99.44	93.85	99.44	99.44	99.44	99.44	99.44	99.44	99.44	99.44	99.44
B175L	100	100	94.86	99.43	98.29	100	99.43	99.43	93.14	100	100	100	99.43	100	99.43	99.43	99.43	99.43	99.43	93.14	99.43	99.43	99.43	99.43	99.43	99.43	99.43	99.43	100
H171R	95.32	95.32	100	95.91	94.15	95.32	95.91	95.91	92.57	95.32	95.32	95.32	95.91	95.32	95.91	95.91	95.91	95.91	95.91	92	95.91	95.91	95.91	95.91	95.91	95.91	95.91	95.91	95.32
B169L	100	100	93.41	97.63	96.45	100	98.17	98.17	93.08	100	100	100	98.17	100	98.17	98.17	98.17	98.17	98.17	93.08	98.17	98.17	98.17	98.17	98.17	98.17	98.17	98.17	100
E183L	83.66	83.66	64.38	92.81	100	83.66	86.36	86.36	71.61	83.66	83.66	83.01	86.36	83.66	86.36	86.36	86.36	86.36	86.36	71.61	86.36	86.36	85.71	86.36	86.36	86.36	86.36	86.36	83.66
E165R	100	100	93.83	98.79	98.79	100	99.39	99.39	95.76	100	100	100	99.39	100	99.39	99.39	99.39	99.39	99.39	95.76	99.39	99.39	99.39	99.39	99.39	99.39	99.39	99.39	100
F165R	96.18	96.18	100	97.45	97.79	96.18	98.09	98.09	96.82	96.18	96.18	96.18	98.53	96.18	98.09	98.09	98.09	98.09	98.09	96.82	98.09	98.09	97.45	98.09	98.09	98.09	98.09	98.09	96.18
EP152R	100	100	92.05	95.33	96.71	100	97.37	97.37	87.29	100	100	100	97.37	100	97.37	97.37	97.37	97.37	97.37	87.29	97.37	97.37	97.37	97.37	97.37	97.37	97.37	97.37	100
C147L	99.32	97.96	100	99.32	100	88.28	98.64	98.64	97.96	99.32	98.64	99.32	98.64	99.32	98.64	98.64	98.64	98.64	98.64	97.96	98.64	98.64	98.64	98.64	98.64	98.64	98.64	98.64	99.32
E146L	100	100	95.89	99.32	98.63	100	98.63	98.63	92.47	100	100	100	98.63	100	98.63	98.63	98.63	98.63	98.63	92.47	98.63	98.63	98.63	98.63	98.63	98.63	98.63	98.63	100
K145R	100	100	97.93	99.31	100	100	100	100	96.55	100	100	100	100	99.31	100	100	99.31	99.31	99.31	96.55	100	100	97.93	100	100	100	100	100	100
E120R	95	94.17	93.44	91.74	95.12	95.68	99.18	99.29	87.6	95.68	94.17	95	99.29	95	99.18	99.18	99.18	99.18	99.18	87.6	99.18	100	99.18	99.18	99.18	99.18	99.18	99.18	94.17
MGF100-2L	100	98.4	88.65	96.45	96.45	100	97.16	97.16	88.65	100	98.4	100	97.16	100	97.16	97.16	97.16	97.16	97.16	88.65	97.16	97.16	97.16	97.16	97.16	97.16	97.16	97.16	100
A137R	100	100	90.51	94.16	93.43	100	99.27	99.27	85.4	100	100	100	99.27	100	99.27	99.27	99.27	99.27	99.27	85.4	99.27	99.27	99.27	99.27	99.27	99.27	99.27	99.27	100
C129R	100	100	94.57	95.35	96.9	100	99.22	99.22	93.8	100	100	100	99.22	100	99.22	99.22	99.22	99.22	99.22	94.57	99.22	99.22	99.22	99.22	99.22	99.22	99.22	99.22	100
hypothetical protein F8221_gp099	100	100	94.23	95.9	97.54	100	99.18	99.18	86.78	100	100	100	99.18	100	99.18	99.18	99.18	99.18	99.18	86.78	99.18	99.18	99.18	99.18	99.18	99.18	99.18	99.18	100
H124R	95.16	95.16	95.16	95.97	95.97	95.16	95.16	95.16	100	95.16	95.16	95.16	95.16	95.16	95.16	95.16	95.16	95.16	95.16	100	95.16	95.16	95.16	95.16	95.16	95.16	95.16	95.16	95.16
CP123L	100	100	97.12	95.93	96.75	100	97.54	97.54	92.68	100	100	100	97.54	100	97.54	97.54	97.54	97.54	97.54	92.68	97.54	97.54	97.54	97.54	97.54	97.54	97.54	97.54	100
B119L	100	99.16	93.28	97.48	97.48	100	100	100	94.96	100	99.16	100	100	100	100	100	100	100	100	94.96	100	100	100	100	100	100	100	100	100
D117L	100	100	89.74	94.87	99.15	100	95.73	95.73	91.45	100	100	100	95.73	100	94.87	95.73	95.73	95.73	95.73	91.45	95.73	95.73	95.73	95.73	95.73	95.73	95.73	95.73	100
H108R	96.3	96.3	100	95.37	96.3	96.3	94.44	94.44	90.99	96.3	96.3	96.3	94.44	96.3	94.44	94.44	94.44	94.44	94.44	90.99	94.44	94.44	94.44	94.44	94.44	94.44	94.44	94.44	96.3
K78R	100	100	70.19	92.31	95.15	98.72	100	100	87.01	100	100	100	100	100	100	100	100	100	100	88.31	100	100	100	100	100	100	100	100	100
CP80R	100	100	98.75	98.75	98.75	100	98.75	98.75	98.75	100	100	98.75	98.75	100	98.75	98.75	98.75	98.75	98.75	98.75	98.75	98.75	98.75	98.75	98.75	98.75	98.75	98.75	100
B66L	100	100	100	100	100	100	100	100	98.48	100	100	100	100	100	100	100	100	100	100	98.48	100	100	100	100	100	100	100	100	100
O61R	100	100	100	100	98.36	100	100	100	95.16	100	100	100	100	100	100	100	100	100	100	95.16	100	100	100	100	100	100	100	100	100
NP868R	100	99.77	97.24	98.96	98.85	99.07	99.54	99.54	96.77	100	99.77	99.77	100	99.88	99.54	99.54	99.54	99.54	99.54	96.66	99.54	99.42	99.54	99.54	99.54	99.54	99.54	99.54	100
P1192R	100	99.92	97.48	98.66	98.41	100	98.99	98.99	96.14	99.92	99.92	99.92	98.99	99.92	98.99	98.99	98.99	98.99	98.99	96.14	98.99	98.99	98.99	98.99	98.99	98.99	98.99	98.99	99.92
K421R	97.62	97.86	95	100	98.34	95.53	98.82	98.82	100	97.86	97.86	97.86	98.6	97.62	98.82	98.82	98.82	98.82	98.82	99.76	98.82	98.82	98.82	98.82	98.82	98.82	98.82	94.96	97.86
QP383R	95.3	95.3	91.22	100	96.64	100	94.52	94.52	88.82	95.3	95.3	95.3	94.52	95.3	94.52	94.52	94.52	94.52	94.52	88.52	94.52	94.52	94.52	94.52	94.52	94.52	94.52	94.52	95.3
A104R	100	100	100	100	100	100	100	100	100	100	100	100	100	100	100	100	100	100	100	100	100	100	100	100	100	100	100	100	100
A238L	95.38	95.38	75.73	100	96.64	95.38	81.61	81.61	74.9	95.38	95.38	95.38	81.61	95.38	81.61	81.61	81.61	81.61	81.61	74.9	81.61	100	81.61	81.61	81.61	81.61	81.61	81.61	95.38
DP238L	90.2	76.89	75.11	98.22	100	77.23	76.79	76.79	100	90.85	76.89	90.85	76.47	76.89	76.79	76.79	76.79	76.79	76.79	100	76.79	76.47	76.79	76.79	76.79	76.79	76.79	76.47	76.89
O174L	100	100	98.85	95.4	94.83	100	96.55	96.55	94.81	100	100	100	96.55	100	96.55	96.55	96.55	96.55	96.55	96.55	96.55	96.55	96.55	96.55	94.83	96.55	96.55	100	100
B602L	100	100	100	69.65	70.66	69.19	70.75	70.75	68.57	69.83	100	91.36	68.09	70.82	70.75	70.75	70.75	70.75	70.75	68.14	70.75	70.75	70.75	70.75	70.75	70.75	70.75	70.75	91.2
I329L	96.05	96.35	93.01	98.78	100	100	96.66	96.66	90.04	96.35	96.35	96.35	96.66	96.35	96.66	96.66	96.66	96.66	96.66	90.04	96.66	96.66	96.66	96.66	96.66	96.66	96.66	96.66	96.35
EP296R	100	99.66	95.27	99.32	98.65	100	97.97	97.97	94.26	99.66	99.66	99.66	100	100	97.97	97.97	97.97	97.97	97.97	94.26	97.97	97.97	97.97	97.97	97.97	97.97	97.97	97.97	99.66
I177L	93.79	93.79	81.37	97.74	93.22	93.79	100	100	69.57	93.79	93.79	93.79	100	93.79	100	100	100	100	100	69.57	100	100	100	100	100	100	100	100	93.79
I226R	100	99.56	92.48	98.23	97.35	99.56	98.23	98.23	93.36	99.56	99.56	99.56	100	99.56	98.23	98.23	98.23	98.23	98.23	92.92	98.23	98.23	98.23	98.23	98.23	98.23	98.23	98.23	99.56
A151R	91.39	92.72	78.81	92.72	100	92.05	87.42	87.42	76.67	92.05	92.72	92.05	87.42	92.05	87.42	87.42	87.42	87.42	87.42	76.67	87.42	87.42	87.42	87.42	87.42	87.42	87.42	100	92.05
MGF300-2R	100	100	100	100	95.62	100	97.5	97.5	91.25	100	100	100	88	100	97.5	97.5	97.5	97.5	97.5	91.25	97.5	97.5	96.88	97.5	97.5	97.5	97.5	91.49	100
MGF360-16R	91	91.06	100	94.17	94.17	91.06	93.75	93.75	86.93	91	91.06	93.29	91.26	100	93.75	93.75	93.75	93.75	93.75	86.93	93.75	93.75	93.75	93.75	93.75	93.75	93.75	93.75	91.06
MGF505-3R	85.71	100	86.33	84.64	85.41	85.71	85.71	85.71	100	85.71	100	85.71	85.71	85.36	85.71	85.71	85.71	85.71	85.71	100	85.71	85.36	85.71	85.71	85.71	85.71	85.71	85.71	85.71
p360-15R	77.95	100	87.92	77.22	79.32	78.35	77.22	77.22	100	78.35	100	78.35	77.22	78.35	77.22	77.22	77.22	77.22	77.22	99.22	77.22	77.22	77.22	77.22	77.22	77.22	77.22	77.22	100
K196R	100	100	92.55	96.81	97.45	100	99.49	100	91.89	100	100	100	99.49	100	99.49	99.49	99.49	99.49	99.49	91.89	99.49	99.49	99.49	99.49	99.49	99.49	99.49	99.49	100
D129L	72.87	72.87	82.67	75.19	73.85	72.87	100	100	100	98.45	98.45	98.45	100	98.45	100	100	100	100	100	0	100	100	100	100	100	100	100	100	98.45
MGF100-3L	81.82	81.82	100	80.82	80.14	81.82	100	100	84.09	81.82	81.82	81.82	100	81.82	100	100	100	100	100	84.25	100	100	100	100	100	100	100	100	81.82
B125R	100	100	97.6	100	99.2	100	100	100	98.4	100	100	100	100	100	100	100	100	100	100	98.4	100	100	100	100	100	100	100	100	100
B117L	85.47	85.47	86.67	89.29	83.74	100	86.96	86.96	100	85.47	85.47	85.47	86.96	84.62	86.96	86.96	86.96	86.96	86.96	99.2	86.96	86.96	86.96	86.96	86.96	86.96	86.96	86.96	85.47
E111R	100	100	97.3	98.2	100	100	100	100	100	100	100	100	100	100	100	100	100	100	100	95.5	100	100	100	100	100	100	100	100	99.1
C84L	63.16	63.16	65.79	63.16	64.47	63.16	63.16	100	61.54	63.16	63.16	63.16	100	63.16	63.16	63.16	63.16	63.16	63.16	61.54	63.16	63.16	100	63.16	63.16	63.16	63.16	63.16	63.16
EP364R	87.91	87.91	87.99	91.33	91.28	87.91	90.24	90.24	100	87.91	87.91	87.91	100	87.64	90.24	90.24	90.24	90.24	90.24	99.46	90.24	90.24	86.25	90.24	90.24	90.24	90.24	90.24	87.91
B438L	100	100	94.05	95.89	97.26	100	99.09	99.09	93.38	100	100	100	100	100	99.09	99.09	99.09	99.09	99.09	93.38	99.09	99.09	99.09	99.09	99.09	99.09	99.09	100	100

## Sheet: dispensable_gene
	ASFV strains name
	Benin 97/1 (AM712239)	Portugal/OURT88/3 (AM712240)	Malawi/tick/Lil-20/1/1983(AY261361)	SA/Pretorisuskop/96/4(AY261363)	Malawi/Tengani 62(AY261364)	Spain/E75(FN557520)	Georgia 2007/1(FR682468)	Russia/Kashino_04/13(KJ747406)	Kenya/Ken06.Bus(KM111295)	Portugal/L60(KM262844)	Portugal/NHV/1968(KM262845)	Spain/BA71 (KP055815)	Russia/Odintsovo_02/14 (KP843857)	Italy/47/Ss/2008 (KX354450)	Belgium_2018/1 (LR536725)	Estonia 2014 (LS478113)	Pol16_20186_o7(MG939583)	Pol16_29413_o23(MG939586)	Pol17_05838_C220(MG939589)	Uganda/R35/2015 (MH025920)	POL/2015/Podlaskie (MH681419)	China/2018/SY-18 (MH766894)	Georgia_2008/1(MH910495)	Georgia_2008/2(MH910496)	China/2018/AnhuiXCGQ(MK128995)	China/Pig/HLJ/2018(MK333180)	China/DB/LN/2018(MK333181)	China/GD/2019(MW361944)	Spain/BA71V(NC_001659)
ORFs	ORFs identity
MGF505-1R	100	0	100	90.4	90.77	100	90.21	90.21	87.74	100	0	100	90.21	99.81	90.21	90.21	90.21	90.21	90.21	87.92	90.21	90.21	90.21	90.21	90.21	90.21	90.21	90.21	0
MGF505-2R	100	0	91.03	97.29	97.29	98.83	99.05	99.05	86.45	100	0	100	100	100	99.05	99.05	99.05	99.05	99.05	86.64	99.05	99.05	99.05	99.05	99.05	99.05	99.05	99.05	98.57
MGF505-4R	0	0	0	0	0	0	0	0	0	0	0	0	0	0	0	0	0	0	0	0	0	100	0	0	0	0	0	0	0
MGF360-4L	93.78	94.04	94.3	86.01	0	94.04	100	100	100	94.04	94.04	0	100	90.94	100	100	100	100	100	99.22	100	99.74	100	100	100	100	100	100	0
EP402R	0	0	0	0	100	0	64.17	64.17	100	0	0	0	0	0	64.17	64.17	64.17	64.17	64.17	100	64.17	0	64.17	64.17	64.17	64.17	64.17	0	0
MGF505-6R	0	0	0	0	0	0	0	0	0	0	0	0	0	0	0	0	0	0	95.71	0	0	100	0	0	0	0	0	0	0
MGF360-6L	100	0	90.4	96.53	100	100	97.6	97.6	90.4	100	0	0	97.6	99.73	97.6	97.6	97.6	97.6	97.6	88.05	97.6	97.6	97.6	97.6	97.6	97.6	97.6	97.33	0
MGF360-21R	0	0	73.55	0	0	0	0	0	65.83	0	0	0	0	0	0	0	0	0	0	100	0	0	0	0	0	0	0	0	0
MGF360-9L	96.86	96.17	78.47	77.46	96.97	96.86	100	100	75.71	96.86	96.17	96.86	100	96.86	100	100	100	100	100	75.71	100	100	100	100	100	100	100	100	0
MGF360-14L	100	0	89.92	95.8	95.52	100	98.88	98.88	89.36	100	0	100	98.88	100	98.88	98.88	98.88	98.88	98.88	89.36	98.88	98.88	98.88	98.88	98.88	98.88	98.88	98.88	0
MGF360-10L	100	0	83.66	93.82	87.36	100	87.29	89.57	75	100	0	100	89.57	100	89.57	87.29	87.29	87.29	87.29	75	87.29	87.01	87.29	87.29	87.01	87.01	87.01	0	0
MGF360-13L	100	0	86.4	91.5	92.63	100	95.75	95.75	100	100	0	100	95.75	100	95.75	95.75	95.75	95.75	95.75	84.42	95.75	95.47	95.75	95.75	95.75	95.75	95.75	0	0
MGF110-13L	0	0	61.19	100	0	0	70.22	77.74	0	0	71.74	0	77.94	0	70.22	0	77.74	77.74	77.74	100	77.74	70.48	76.56	77.74	77.74	77.74	77.74	0	0
MGF110-9L	0	82.26	0	100	97.59	0	96.55	96.55	87.93	0	82.26	0	96.55	0	96.55	0	96.55	96.55	96.55	87.59	96.55	96.55	96.55	96.55	96.55	96.55	96.55	96.55	0
MGF110-1L	83.7	83.33	86.99	87.73	87.04	83.7	89.72	88.85	100	84.07	83.7	83.7	89.8	83.7	89.8	0	89.8	89.8	89.8	99.63	89.72	89.8	88.85	89.8	89.8	89.8	89.8	89.8	83.33
MGF110-6L	0	0	0	0	0	0	100	100	0	0	0	0	100	0	100	0	100	100	100	0	100	99.51	100	100	100	100	100	100	0
MGF360-1L	0	0	0	100	0	0	0	0	0	0	0	0	0	100	0	0	0	0	0	100	0	0	0	0	0	0	0	58.76	0
Envelope protein 167	0	0	0	0	100	0	0	0	0	0	0	0	0	0	0	0	0	0	0	0	0	0	0	0	0	0	0	0	0
MGF110-12L	0	0	100	0	0	0	0	0	83.04	0	0	0	0	0	0	0	0	0	0	83.04	0	0	0	0	0	0	0	0	0
MGF110-11L	77.78	88.12	80.87	0	0	77.78	80.87	91.6	100	77.78	0	0	91.6	63.79	80.87	0	91.6	0	91.6	0	91.6	80.87	91.6	91.6	91.6	91.6	91.6	91.6	0
KP177R	98.31	98.31	81.36	94.92	95.48	98.31	100	100	80	98.31	98.31	98.31	100	98.31	100	0	100	100	100	80	100	100	100	100	100	100	100	100	98.31
Envelope protein 169	61.18	61.18	57.83	100	58.24	61.18	59.41	59.41	59.06	61.18	61.18	61.18	59.41	61.18	59.41	59.41	59.41	59.41	59.41	59.06	59.41	59.41	59.41	59.41	59.41	59.41	59.41	59.41	0
EP153R	69.28	61.95	100	76.13	66.67	69.28	81.65	60.12	100	69.28	61.95	69.28	81.65	69.28	81.65	81.65	81.65	81.65	81.65	100	81.65	0	81.65	81.65	81.65	81.65	81.65	100	69.28
MGF110-7L	0	0	80.8	87.59	100	0	91.97	91.97	100	0	0	76.32	91.97	0	91.97	0	91.97	91.97	91.97	80.29	91.97	98.08	91.97	91.97	91.97	91.97	91.97	100	0
DP402R	0	0	0	0	0	0	0	0	0	0	0	0	100	0	0	0	0	0	0	0	0	0	0	0	0	0	0	100	0
MGF110-14L	100	0	96.06	0	0	100	0	0	0	100	0	0	0	0	96.75	98.44	0	0	0	0	0	98.41	75.41	0	0	0	0	74.34	0
MGF110-8L	0	0	95.16	96.77	0	0	100	100	0	0	0	0	100	0	100	0	100	100	100	0	100	100	100	100	100	100	100	100	0
MGF100-1R	0	87.9	100	87.9	88.71	0	88.71	88.71	100	0	87.9	0	88.71	0	88.71	0	88.71	88.71	88.71	100	88.71	88.71	88.71	88.71	88.71	88.71	88.71	88.71	0
A125L	0	0	0	0	0	0	0	0	57.39	0	0	0	0	0	0	0	0	0	0	0	0	0	0	0	0	0	0	50	100
MGF110-4L	0	100	91.94	93.55	95.97	0	89.52	89.52	88.71	0	100	95.97	89.52	0	89.52	0	89.52	89.52	89.52	88.71	89.52	90.32	89.52	89.52	89.52	89.52	89.52	0	95.97
MGF110-2L	0	84.62	100	92.31	96.15	0	91.35	91.35	84.07	0	84.62	85.58	91.35	0	91.35	0	91.35	91.35	91.35	83.19	91.35	91.35	91.35	91.35	91.35	91.35	91.35	91.35	86.54
L356L	100	0	0	0	0	100	62.26	62.26	0	0	0	0	62.26	100	62.26	0	62.26	62.26	62.26	0	62.26	62.26	62.26	62.26	62.26	62.26	62.26	62.26	0
C105R	100	100	99.05	99.05	99.05	100	100	100	99.05	100	100	100	100	100	100	100	100	100	100	99.05	100	100	0	100	100	100	100	100	100
I8L	100	100	98.06	100	100	100	100	100	97.09	100	100	100	100	100	100	100	100	100	100	97.09	100	100	100	100	100	100	100	100	0
M98R	100	100	80.61	93.75	93.75	100	91.67	91.67	78.57	98.98	100	100	91.67	100	91.67	91.67	91.67	91.67	91.67	78.57	90.62	0	91.67	91.67	91.67	91.67	91.67	91.67	0
DP96R	100	100	0	84.21	78.31	100	95.83	95.83	0	100	100	100	95.83	100	95.83	95.83	95.83	95.83	95.83	0	95.83	95.83	95.83	95.83	95.83	95.83	95.83	95.83	100
I12R	0	0	50.62	0	0	0	0	0	100	0	0	0	0	0	0	0	0	0	0	100	0	0	0	0	0	0	0	0	0
L60L	77.61	77.61	100	90	100	77.61	96.15	96.15	71.74	77.61	77.61	77.61	96.15	77.61	96.15	0	96.15	96.15	96.15	71.74	96.15	96.15	96.15	96.15	96.15	96.15	96.15	96.15	89.47
I11L	0	0	0	0	100	0	0	0	0	0	0	0	0	0	0	0	0	0	0	0	0	0	0	0	0	0	0	0	0
A118R	100	100	0	0	0	100	0	0	0	100	100	100	0	100	0	0	0	0	0	0	0	0	0	0	0	0	0	0	100
MGF360-19R	0	0	0	0	0	100	100	100	0	0	0	0	100	0	100	100	100	100	100	0	100	100	100	100	100	100	100	100	0
EP84R	100	98.81	92.77	91.57	96.39	100	96.43	96.43	91.67	100	98.81	100	96.43	100	96.43	96.43	96.43	96.43	96.43	91.67	96.43	96.43	0	96.43	96.43	96.43	96.43	96.43	100
L83L	100	98.8	72.29	92.59	91.36	98.8	95.06	95.06	74.7	98.8	98.8	98.8	0	98.8	95.06	0	95.06	95.06	95.06	74.7	95.06	95.06	95.06	95.06	95.06	95.06	95.06	95.06	98.8
MGF110-5L	0	0	0	0	0	0	0	0	0	0	0	100	0	0	0	0	0	0	0	0	0	100	0	0	0	0	0	0	0
X69R	50	50	100	50	0	50	97.1	0	0	50	50	50	97.1	50	97.1	97.1	97.1	97.1	97.1	0	97.1	97.1	95.65	97.1	97.1	97.1	97.1	97.1	50
DP60R	100	0	0	100	70.83	68.97	92.59	92.59	0	75	0	75	64.62	75	64.41	64.41	64.41	64.41	64.41	0	100	64.41	92.59	92.59	92.59	64.41	64.41	64.41	75
I196L	97.47	97.47	80.47	82.43	81.76	96.97	100	100	100	97.47	97.47	97.47	83.46	97.47	100	100	100	84.25	100	100	100	84.25	100	100	100	100	100	0	97.47
D79L	100	100	92.41	98.73	97.47	100	100	100	97.47	100	100	100	0	100	100	100	100	100	100	96.2	100	100	100	100	100	100	100	100	100
DP71L	91.67	91.55	82.07	94.37	100	91.55	92.86	92.86	100	91.55	91.55	91.55	92.86	0	92.86	92.86	92.86	92.86	92.86	100	92.86	92.86	92.86	92.86	92.86	92.86	92.86	92.86	91.55
I7L	0	0	0	0	0	0	0	0	0	0	0	0	100	0	0	0	0	0	0	0	0	0	0	0	0	0	0	0	0
MGF360-2L	0	0	0	0	0	0	0	0	100	0	0	0	0	0	0	0	0	0	0	100	0	0	0	0	0	0	0	0	0
MGF360-17R	0	100	0	0	0	0	0	0	0	0	100	0	0	0	0	0	0	0	0	0	0	0	0	0	0	0	0	0	0
p01990-2L	0	0	100	0	0	0	0	0	0	0	0	0	0	0	0	0	0	0	0	60.61	0	0	0	0	0	0	0	0	0
I73R	0	0	100	100	98.61	0	97.22	97.22	0	0	0	0	97.22	0	97.22	97.22	97.22	97.22	97.22	0	97.22	97.22	97.22	97.22	97.22	97.22	97.22	97.22	0
A528R	0	0	0	0	0	0	0	0	0	0	0	100	0	100	0	0	0	0	0	0	0	0	0	0	0	0	0	0	0
C122R	0	0	0	0	0	0	0	0	0	0	0	0	0	0	0	0	0	0	0	0	0	0	100	0	0	0	0	0	0
UP60L	0	0	0	0	0	0	0	0	0	0	0	0	0	0	0	0	0	0	0	0	0	0	0	0	0	0	0	0	100
MGF360-11L	100	0	0	92.31	0	100	92.45	92.45	0	100	0	100	92.45	100	92.45	92.45	92.45	92.45	92.45	0	92.45	92.45	92.45	92.45	92.45	92.45	92.45	92.45	0
E66L	0	0	0	73.33	72.73	0	100	100	0	0	0	0	0	0	100	100	100	100	100	0	100	100	100	100	100	100	100	100	0
MGF360-7L	0	0	0	0	0	0	0	0	0	0	0	0	0	0	0	0	0	0	0	100	0	0	0	0	0	0	0	0	0
DP63R	100	0	0	0	0	0	0	0	0	0	0	0	0	0	0	0	0	0	0	0	0	0	0	0	0	0	0	0	0
DP42R	100	0	0	0	0	100	0	0	0	0	0	100	0	100	0	0	0	0	0	0	0	0	0	0	0	0	0	0	100
ASFV_G_ACD_00190	0	0	0	0	0	0	0	100	0	0	0	0	100	0	0	0	0	0	0	0	100	100	0	0	100	100	100	100	0
ASFV_G_ACD_00290	0	0	0	62.22	100	0	54.76	54.76	0	0	0	0	55.56	0	54.76	54.76	54.76	55.56	55.56	0	54.76	54.76	54.76	54.76	54.76	55.56	55.56	54.76	0
ASFV_G_ACD_00160	0	100	0	0	90.48	0	0	0	0	0	100	0	0	0	0	0	0	0	0	0	0	0	0	0	0	0	0	0	0
ASFV_G_ACD_00240	100	0	62.5	0	0	100	88.89	88.89	0	100	0	0	74.07	81.48	88.89	0	88.89	88.89	88.89	0	88.89	88.89	88.89	88.89	88.89	88.89	88.89	88.89	0
ASFV_G_ACD_00210	0	0	0	0	0	0	100	100	100	0	0	0	100	0	100	0	100	100	100	100	100	100	100	100	100	100	100	0	0
ASFV_26544_01960	0	0	0	0	0	0	0	0	0	0	0	0	0	0	0	0	0	0	0	0	0	0	0	0	0	100	100	0	0
ASFV_G_ACD_00600	0	0	80	0	0	100	0	0	0	0	0	0	0	0	0	0	0	0	0	0	0	0	0	0	0	0	0	0	0
ASFV_G_ACD_00350	0	0	0	74.42	100	0	0	0	0	0	0	100	0	0	0	0	0	0	0	0	76.74	0	0	76.74	0	0	0	0	0
hypothetical protein IM014_gp175	0	0	0	0	0	0	0	0	0	0	0	0	100	0	0	0	0	0	0	0	0	0	0	0	0	0	0	0	0
hypothetical protein IM014_gp069	0	0	0	0	0	0	100	100	0	0	0	0	100	0	100	100	100	100	100	0	100	100	100	100	100	100	100	100	0
hypothetical protein IM014_gp072	100	100	100	51.92	0	0	0	0	0	100	100	100	0	0	0	0	0	0	0	0	0	0	0	0	0	0	0	0	100
hypothetical protein IM014_gp012	0	100	0	0	0	0	0	0	0	0	100	0	0	0	0	0	0	0	0	0	0	0	0	0	0	0	0	0	0
hypothetical protein F8221_gp161	0	0	0	100	0	96.15	96.15	0	0	0	0	0	96.15	0	96.15	0	96.15	96.15	96.15	0	0	96.15	96.15	0	0	96.15	96.15	0	0
hypothetical protein IM014_gp031	80	0	0	0	0	0	100	79.31	74.38	80.34	0	0	79.13	76.86	0	0	79.31	0	79.13	91.74	79.13	0	0	79.13	79.13	79.31	79.31	0	0
hypothetical protein IM014_gp061	0	0	0	0	0	0	0	0	0	0	0	0	0	0	0	0	0	0	100	0	0	0	0	0	0	0	0	0	0
hypothetical protein IM014_gp004	0	0	0	0	0	0	0	100	0	0	0	0	0	0	0	0	0	0	0	0	0	0	0	0	0	0	0	0	0
hypothetical protein IM014_gp003	0	0	0	0	0	0	100	100	0	0	0	0	100	100	100	100	100	100	100	0	100	100	100	100	100	100	100	100	0
hypothetical protein F8221_gp213	0	0	0	0	0	0	0	0	0	0	0	0	0	100	0	0	0	0	0	0	0	0	0	0	0	0	0	0	0
hypothetical protein IM014_gp194	100	100	0	0	0	100	0	0	0	100	100	100	0	0	0	0	0	0	0	0	0	0	0	0	0	0	0	0	100
hypothetical protein IM014_gp014	0	0	0	0	0	0	0	0	0	0	0	0	0	0	0	0	0	0	0	0	0	100	0	0	0	0	0	0	0
hypothetical protein F8221_gp208	0	0	0	0	0	0	0	0	100	0	0	0	0	0	0	0	0	0	0	100	0	0	0	0	0	0	0	0	0
hypothetical protein	100	100	0	0	0	100	0	0	0	100	100	100	0	0	0	0	0	0	0	0	0	0	0	0	0	0	0	0	100
unnamed protein product	0	0	0	0	0	0	0	0	0	0	0	0	0	0	0	0	0	0	0	0	0	0	0	0	0	0	0	100	0
unnamed protein product	0	0	0	0	0	0	0	0	0	0	0	0	0	0	0	0	0	0	0	100	0	0	0	0	0	0	0	0	0
unnamed protein product	0	0	0	0	0	0	100	0	0	0	0	0	0	0	0	0	0	0	0	0	0	0	0	0	0	0	0	0	0
unnamed protein product	85.33	0	0	100	0	85.33	0	0	0	85.33	0	85.33	0	0	0	0	0	0	0	0	0	0	0	0	0	0	0	0	85.33
unnamed protein product	0	0	0	0	100	0	0	0	0	0	0	0	0	0	0	0	0	0	0	0	0	0	0	0	0	0	0	0	0
unnamed protein product	0	0	0	0	0	0	0	0	0	100	0	0	0	0	0	0	0	0	0	0	0	0	0	0	0	0	0	0	0
unnamed protein product	0	0	100	0	0	0	0	0	0	0	0	0	0	0	0	0	0	0	0	0	0	0	0	0	0	0	0	0	0
unnamed protein product	0	0	0	0	100	0	0	0	0	0	0	0	0	0	0	0	0	0	0	0	0	0	0	0	0	0	0	0	0
unnamed protein product	0	0	0	0	0	0	0	0	100	0	0	0	0	0	0	0	0	0	0	0	0	0	0	0	0	0	0	0	0
unnamed protein product	0	0	0	100	0	0	0	0	0	0	0	0	0	0	0	0	0	0	0	0	0	0	0	0	0	0	0	0	0
unnamed protein product	0	0	0	0	0	0	0	0	0	0	0	0	100	0	0	0	0	0	0	0	0	0	0	0	0	0	0	0	0
unnamed protein product	0	100	0	0	0	0	0	0	0	0	100	0	0	0	0	0	0	0	0	0	0	0	0	0	0	0	0	0	0
unnamed protein product	0	0	0	0	100	0	0	0	0	0	0	0	0	0	0	0	0	0	0	0	0	0	0	0	0	0	0	0	0
unnamed protein product	0	0	0	0	0	100	0	0	0	0	0	0	0	0	0	0	0	0	0	0	0	0	0	0	0	0	0	0	0
unnamed protein product	0	0	0	0	0	0	0	0	100	0	0	0	0	0	0	0	0	0	0	0	0	0	0	0	0	0	0	0	0
unnamed protein product	0	0	0	100	0	0	0	0	0	0	0	0	0	0	0	0	0	0	0	0	0	0	0	0	0	0	0	0	0
unnamed protein product	0	0	0	0	0	0	0	0	100	0	0	0	0	0	0	0	0	0	0	100	0	0	0	0	0	0	0	0	0
unnamed protein product	0	0	0	0	0	0	0	0	0	0	0	0	0	100	0	0	0	0	0	0	0	0	0	0	0	0	0	0	0
unnamed protein product	100	0	0	0	0	100	0	0	0	0	0	0	0	0	0	0	0	0	0	0	0	0	0	0	0	0	0	0	0
unnamed protein product	0	0	0	0	0	0	0	0	0	0	0	100	0	0	0	0	0	0	0	0	0	0	0	0	0	0	0	0	0
unnamed protein product	0	0	0	0	0	74.29	74.29	74.29	100	0	0	74.29	74.29	74.29	74.29	74.29	74.29	74.29	74.29	100	74.29	74.29	74.29	74.29	74.29	74.29	74.29	74.29	0
unnamed protein product	0	0	0	0	0	0	100	100	0	0	0	0	100	0	100	0	100	100	100	0	100	100	100	100	100	100	100	100	0
unnamed protein product	0	100	0	86.36	0	0	0	0	0	90.91	100	0	0	0	0	0	0	0	0	0	0	0	0	0	0	0	0	0	0
unnamed protein product	0	0	100	0	0	0	0	0	0	0	0	0	0	0	0	0	0	0	0	0	0	0	0	0	0	0	0	0	0
unnamed protein product	0	0	100	0	0	0	0	0	0	55.81	0	0	0	0	0	0	0	0	0	0	0	0	0	0	0	0	0	0	0
unnamed protein product	0	0	0	0	100	0	0	0	0	0	0	0	0	0	0	0	0	0	0	0	0	0	0	0	0	0	0	0	0
unnamed protein product	0	0	0	0	0	0	0	0	0	100	85.29	85.29	0	0	0	0	0	0	0	0	0	0	0	0	0	0	0	0	0
unnamed protein product	0	0	0	0	0	0	0	0	0	0	0	0	0	0	0	0	0	0	0	100	0	0	0	0	0	0	0	0	0
unnamed protein product	0	0	0	0	0	0	0	0	0	0	0	0	0	0	0	0	0	0	0	100	0	0	0	0	0	0	0	0	0
unnamed protein product	0	0	0	0	0	0	0	0	100	0	0	0	0	0	0	0	0	0	0	0	0	0	0	0	0	0	0	0	0
unnamed protein product	0	0	0	0	0	0	0	0	100	0	0	0	0	0	0	0	0	0	0	100	0	0	0	0	0	0	0	0	0
unnamed protein product	0	0	100	0	0	78.18	0	0	0	0	0	0	0	0	0	0	0	0	0	0	0	0	0	0	0	0	0	0	0
unnamed protein product	0	0	0	100	0	0	0	0	0	0	0	0	0	0	0	0	0	0	0	0	0	0	0	0	0	0	0	0	0
unnamed protein product	0	0	0	0	0	0	0	0	0	0	0	0	0	100	0	0	0	0	0	0	0	0	0	0	0	0	0	0	100
unnamed protein product	100	0	85.71	0	0	100	0	0	0	100	0	100	0	100	0	0	0	0	0	0	0	0	0	0	0	0	0	0	0
unnamed protein product	0	100	0	0	0	0	0	0	0	0	100	0	0	75.56	0	0	0	0	0	0	0	0	0	0	0	0	0	0	0
unnamed protein product	0	0	0	100	0	0	0	0	0	0	0	0	0	0	0	0	0	0	0	0	0	0	0	0	0	0	0	0	0
unnamed protein product	0	0	0	0	0	0	0	0	100	0	0	0	0	0	0	0	0	0	0	0	0	0	0	0	0	0	0	0	0
unnamed protein product	0	0	0	0	100	0	0	0	0	0	0	0	0	0	0	0	0	0	0	0	0	0	0	0	0	0	0	0	0
unnamed protein product	100	0	0	0	0	0	0	0	0	0	0	0	0	0	0	0	0	0	0	0	0	0	0	0	0	0	0	0	0
unnamed protein product	0	0	0	0	0	0	0	0	0	0	0	0	0	0	0	0	0	0	0	100	0	0	0	0	0	0	0	0	0
unnamed protein product	0	0	0	100	0	0	0	0	0	0	0	0	0	0	0	0	0	0	0	0	0	0	0	0	0	0	0	0	0
unnamed protein product	0	0	0	0	100	0	0	0	0	0	0	0	0	0	0	0	0	0	0	0	0	0	0	0	0	0	0	0	0
unnamed protein product	0	0	100	0	0	0	0	0	0	0	0	0	0	0	0	0	0	0	0	0	0	0	0	0	0	0	0	0	0
unnamed protein product	0	0	0	0	0	0	0	0	100	0	0	0	0	0	0	0	0	0	0	100	0	0	0	0	0	0	0	0	0
unnamed protein product	0	100	0	0	0	0	0	0	0	0	100	0	0	0	0	0	0	0	0	0	0	0	0	0	0	0	0	0	0
unnamed protein product	0	100	0	0	0	0	0	0	0	0	100	0	0	0	0	0	0	0	0	0	0	0	0	0	0	0	0	0	0
unnamed protein product	100	0	0	0	0	100	0	0	0	0	0	0	0	0	0	0	0	0	0	0	0	0	0	0	0	0	0	0	100
unnamed protein product	0	0	0	0	0	0	0	0	100	0	0	0	0	0	0	0	0	0	0	100	0	0	0	0	0	0	0	0	0

## Sheet: pan_gene
	ASFV strains name
	Benin 97/1 (AM712239)	Portugal/OURT88/3 (AM712240)	Malawi/tick/Lil-20/1/1983(AY261361)	SA/Pretorisuskop/96/4(AY261363)	Malawi/Tengani 62(AY261364)	Spain/E75(FN557520)	Georgia 2007/1(FR682468)	Russia/Kashino_04/13(KJ747406)	Kenya/Ken06.Bus(KM111295)	Portugal/L60(KM262844)	Portugal/NHV/1968(KM262845)	Spain/BA71 (KP055815)	Russia/Odintsovo_02/14 (KP843857)	Italy/47/Ss/2008 (KX354450)	Belgium_2018/1 (LR536725)	Estonia 2014 (LS478113)	Pol16_20186_o7(MG939583)	Pol16_29413_o23(MG939586)	Pol17_05838_C220(MG939589)	Uganda/R35/2015 (MH025920)	POL/2015/Podlaskie (MH681419)	China/2018/SY-18 (MH766894)	Georgia_2008/1(MH910495)	Georgia_2008/2(MH910496)	China/2018/AnhuiXCGQ(MK128995)	China/Pig/HLJ/2018(MK333180)	China/DB/LN/2018(MK333181)	China/GD/2019(MW361944)	Spain/BA71V(NC_001659)
ORFs	ORFs identity
CP2475L	97.78	97.82	93.78	94.42	100	97.78	94.83	94.83	91.6	97.78	97.82	97.82	94.83	97.78	94.83	94.83	94.83	94.83	94.59	91.6	94.83	94.75	94.39	94.83	94.83	94.83	94.83	94.69	97.82
NP1450L	100	100	99.1	99.38	99.52	99.39	99.72	99.72	99.03	100	100	100	99.72	100	99.72	99.72	99.72	99.72	99.72	99.03	99.72	99.72	99.72	99.72	99.72	99.72	99.72	99.72	99.93
G1340L	100	99.93	97.31	98.81	98.66	97.38	99.25	99.25	96.04	99.93	99.93	99.93	99.25	99.93	99.25	99.25	99.25	99.25	99.25	96.12	99.25	99.25	98.66	99.25	99.25	99.25	99.25	99.25	99.93
M1249L	96.96	97.04	97.2	96.96	97.12	96.93	96.88	96.88	100	97.02	97.04	96.96	96.84	96.96	96.88	96.88	96.88	96.88	96.88	99.76	96.88	96.88	96.88	96.88	96.88	96.88	96.88	96.88	96.96
EP1242L	100	99.92	99.03	99.6	99.68	99.92	99.6	99.6	99.03	99.92	99.92	99.92	99.6	99.84	99.6	99.6	99.6	99.6	99.6	98.87	99.6	99.6	99.6	99.6	99.6	99.6	99.6	99.6	99.84
G1211R	100	100	96.68	98.5	98.42	100	98.67	98.53	96.68	100	100	100	99.41	100	98.67	98.67	98.67	98.67	98.67	96.68	98.67	98.67	98.67	98.67	98.67	98.67	98.67	98.34	99.92
D1133L	100	100	97.36	99.56	98.88	100	99.91	99.91	97.27	100	100	100	99.91	100	99.91	99.91	99.91	99.91	99.91	97.27	99.91	99.91	99.65	99.91	99.91	99.71	99.71	99.91	100
F1055L	94.6	94.5	100	95.15	92.09	94.32	95.42	95.42	95.52	94.6	94.5	94.6	95.42	94.6	95.42	95.42	95.42	95.42	95.42	95.23	95.32	95.42	95.42	95.42	95.42	95.42	95.42	95.42	94.6
B962L	97.05	97.05	100	96.99	96.52	97.05	96.88	96.88	94.91	97.09	97.05	97.09	96.84	97.09	96.88	96.88	96.88	96.88	96.88	94.91	96.88	96.73	96.88	96.88	96.88	96.88	96.88	96.84	96.94
C962R	100	99.9	98.02	98.65	98.54	100	99.06	99.06	97.4	100	100	100	99.06	100	99.06	99.06	99.06	99.06	99.06	97.4	99.06	99.06	99.06	99.06	99.06	99.06	99.06	99.06	100
A859L	100	100	97.56	99.07	98.72	100	99.18	99.18	95.81	100	100	100	99.18	100	99.18	99.07	99.18	99.18	99.18	95.46	99.18	96.5	99.18	99.18	99.18	99.18	99.18	99.18	100
F778R	94.34	94.47	94.74	93.7	94.34	94.47	94.73	94.73	100	94.47	94.47	94.47	94.73	94.22	94.73	94.73	94.73	94.73	94.73	99.87	94.73	94.73	94.6	94.73	94.73	94.73	94.73	94.73	94.47
C717R	100	100	98.74	99.72	99.86	100	100	100	98.61	100	100	100	100	99.86	100	100	100	100	100	98.33	100	100	100	100	100	100	100	100	100
Q706L	100	100	98.3	99.43	99.29	100	99.86	99.86	98.02	100	100	100	99.86	100	99.86	99.86	99.86	99.86	99.86	98.02	99.86	99.86	99.86	99.86	99.86	99.86	99.86	99.86	100
B646L	100	100	98.3	99.54	99.54	100	99.54	99.54	97.99	100	100	100	99.54	100	99.54	99.54	99.54	99.54	99.54	97.99	99.54	99.54	99.54	99.54	99.54	99.54	99.54	99.54	100
MGF505-11L	87.27	86.72	87.27	86.35	86.72	87.27	87.27	87.27	100	87.27	86.72	87.27	87.27	87.27	87.27	87.27	87.27	87.27	87.27	100	87.27	87.27	87.08	87.27	87.27	87.27	87.27	87.27	87.27
MGF505-9R	100	99.81	86.55	95.17	89.54	99.82	90.86	90.86	83.52	99.81	99.81	99.81	90.86	99.81	90.86	90.86	90.86	90.86	79.51	83.71	90.86	90.86	90.86	90.86	90.86	90.86	90.86	79.28	94.32
MGF505-10R	94.28	94.46	52.96	100	97.61	51.58	96.49	96.31	53.25	94.46	94.46	94.46	96.49	94.1	96.49	96.49	96.49	96.49	96.49	53.25	96.49	96.49	96.49	96.31	96.49	96.49	96.49	96.49	94.46
CP530R	97.17	97.36	97.92	97.55	97.55	97.36	97.55	97.55	100	97.55	97.36	97.36	97.55	97.36	97.55	97.55	97.55	97.55	97.55	99.81	97.55	97.55	97.55	97.55	97.55	97.55	97.55	97.55	97.36
MGF505-5R	88.55	88.55	100	88.82	86.14	88.63	88.15	87.95	81.52	88.55	88.55	88.55	88.15	88.55	88.15	88.15	88.15	88.15	88.15	81.52	88.15	88.15	88.15	88.15	88.15	88.15	88.15	88.15	88.55
QP509L	99.02	99.02	96.46	100	98.23	99.02	98.62	98.62	96.07	99.02	99.02	99.02	98.62	99.02	98.62	98.62	98.62	98.62	98.62	96.07	98.62	98.62	98.62	98.62	98.62	98.62	98.62	98.62	99.02
B475L	96.63	96.63	87.04	100	97.25	96.63	96	96	88.16	96.63	96.63	96.63	96	96.63	96	96	96	96	96	88.16	96	96	96	96	96	96	96	96	96.63
C475L	100	100	96.42	98.32	97.89	100	99.58	99.58	94.53	100	100	100	99.58	100	99.58	99.58	99.58	99.58	99.58	94.32	99.58	99.58	99.58	99.58	99.58	99.58	99.58	99.58	100
M448R	100	100	93.05	98.66	99.11	100	98.44	98.44	92.41	100	100	100	98.86	99.55	98.44	98.44	98.44	98.44	98.44	92.63	98.44	98.44	98.44	98.44	98.44	98.44	98.44	98.44	100
EP424R	100	100	98.11	97.88	97.87	100	98.09	98.09	96.23	100	100	100	98.19	100	98.09	98.09	98.09	98.09	98.09	96.23	98.09	98.09	98.09	98.09	98.09	98.09	98.09	98.09	100
E423R	100	100	96.93	99.29	99.05	100	99.53	99.53	94.56	100	100	100	99.53	100	99.53	99.53	99.53	99.53	99.53	94.56	99.53	99.53	99.29	99.53	99.53	99.53	99.53	99.53	100
B407L	88.49	89.81	100	90.78	89.93	90.66	90.29	90.24	75	90.66	89.81	90.66	90.29	90.66	90.29	90.29	90.29	90.29	90.29	75	90.29	90.29	90.29	90.29	90.29	90.29	90.29	90.29	90.66
NP419L	100	100	97.14	98.09	98.33	100	99.28	99.28	95.47	100	100	100	99.05	100	99.05	99.05	99.05	99.05	99.05	95.47	99.28	99.05	99.28	99.28	99.05	99.05	99.05	99.05	100
B385R	100	100	98.7	98.44	98.44	100	100	100	97.92	100	100	100	100	100	100	100	100	100	100	97.92	100	100	99.22	100	100	100	100	100	100
MGF360-18R	70.17	70.17	54.37	100	78.25	72.22	78.93	78.93	54.96	70.17	70.17	70.17	78.93	70.17	78.93	78.93	78.93	78.93	78.93	64.43	78.93	78.93	78.93	78.37	78.93	78.93	78.93	78.93	70.17
H359L	100	100	96.1	98.61	99.16	100	98.89	98.89	94.99	100	100	100	98.89	100	98.89	98.89	98.89	98.89	98.89	94.99	98.89	98.89	98.89	98.89	98.89	98.89	98.89	98.89	100
B354L	100	100	100	99.72	99.72	100	99.72	99.72	99.15	100	100	100	99.6	100	99.72	99.72	99.72	99.72	99.72	99.15	99.72	99.72	99.72	99.72	99.72	99.72	99.72	99.72	100
D345L	100	100	93.04	96.52	97.1	100	99.42	99.42	92.75	100	100	100	99.42	100	99.42	99.42	99.42	99.42	99.42	92.75	99.42	99.42	99.42	99.42	99.42	99.42	99.42	99.42	100
D339L	100	100	97.31	99.12	98.23	100	99.41	99.41	94.93	100	100	100	99.41	100	99.41	99.41	99.41	99.41	99.41	94.93	99.41	99.41	99.41	99.41	99.41	99.41	99.41	99.41	100
H339R	100	100	96.17	98.82	98.82	100	99.71	99.71	97.05	100	100	100	99.71	100	99.71	99.71	99.71	99.71	99.71	96.76	99.71	99.71	99.71	99.71	99.71	99.71	99.71	99.71	100
MGF300-4L	94.82	94.82	87.31	100	93.03	94.82	95.45	95.45	84.55	94.82	94.82	94.82	95.45	94.51	95.45	95.45	95.45	95.45	95.45	84.85	95.45	95.45	95.45	95.45	95.45	95.45	95.45	95.08	94.82
F334L	100	100	98.47	97.86	99.1	100	100	100	96.33	100	100	100	100	100	100	100	100	100	100	96.33	100	100	100	100	100	100	100	100	99.7
MGF360-8L	100	99.69	88.71	94.98	95.61	100	96.24	96.24	86.67	99.69	99.69	99.69	96.24	100	96.24	96.24	96.24	96.24	96.24	86.52	96.24	96.24	94.36	96.24	96.24	96.24	96.24	96.24	99.69
B318L	100	100	96.86	98.43	98.43	100	98.74	98.74	96.54	100	100	100	98.74	100	98.74	98.74	98.74	98.74	98.74	96.23	98.74	98.74	98.74	98.74	98.74	98.74	98.74	98.74	100
F317L	94.64	94.95	100	96.53	95.57	94.95	95.27	95.27	96.2	94.95	94.95	94.95	95.13	94.95	95.27	95.27	95.27	95.27	95.27	96.2	95.27	95.27	95.27	95.27	95.27	95.27	95.27	95.27	94.95
C315R	98.73	98.73	98.41	98.41	98.41	98.73	98.73	98.73	100	98.73	98.73	98.73	98.73	98.73	98.73	98.73	98.73	98.73	98.73	100	98.73	98.73	98.41	98.73	98.73	98.73	98.73	98.73	98.73
CP312R	100	99.67	91.86	95.77	94.46	100	99.67	99.67	90.2	100	99.67	100	99.67	100	99.67	99.67	99.67	99.67	99.67	90.2	99.67	99.67	99.67	99.67	99.67	99.67	99.67	99.67	100
I267L	97	97	94.38	97	100	97	97	97	90.83	97	97	97	83.51	97	96.63	96.63	96.63	96.63	96.63	90.83	97	96.63	97	97	96.63	96.63	96.63	96.63	97
E301R	100	100	99	99.34	99.34	100	99.67	99.67	99.34	100	100	100	99.67	100	99.67	99.67	99.67	99.67	99.67	99.34	99.67	99.67	99.67	99.67	99.67	99.67	99.67	99.67	100
R298L	94.51	92.95	100	94.3	94.3	92.95	93.29	93.29	94.65	92.95	92.95	92.95	93.29	94.51	93.29	93.29	93.29	93.29	93.29	94.98	93.29	93.29	93.29	93.29	93.29	93.29	93.29	93.29	92.95
MGF360-15R	100	100	87.08	96.38	95.5	100	95.16	95.16	86.12	100	100	100	95.16	100	95.16	95.16	95.16	95.16	95.16	85.71	95.16	95.5	95.16	95.16	95.16	95.16	95.16	95.16	100
S273R	100	100	96.34	99.27	99.27	93.27	99.63	99.63	97.07	100	100	100	99.63	100	99.63	99.63	99.63	99.63	99.63	96.34	99.63	99.63	99.63	99.63	99.63	99.63	99.63	99.63	100
MGF300-1L	100	100	92.16	95.15	94.4	100	95.15	95.15	91.42	100	100	100	95.15	100	95.15	95.15	95.15	95.15	95.15	90.67	95.15	95.15	95.15	95.15	95.15	95.15	95.15	95.15	100
B263R	100	100	97.34	98.48	98.86	100	99.62	99.62	96.2	100	100	100	99.62	100	99.62	99.62	99.62	99.62	99.62	96.2	99.62	99.62	99.62	99.62	99.62	99.62	99.62	99.62	100
C257L	100	100	93.77	96.89	97.67	100	99.61	99.61	95.33	100	100	100	99.61	100	99.61	99.61	99.61	99.61	99.61	95.33	99.61	99.61	99.61	99.61	99.61	99.61	99.61	99.61	99.61
D250R	100	100	93.56	99.6	99.2	100	99.6	99.6	93.6	100	100	100	99.6	100	99.6	99.6	99.6	99.6	99.6	93.6	99.6	99.6	99.6	99.6	99.6	99.6	99.6	99.6	99.6
E248R	95.97	95.97	92.8	95.56	95.97	95.97	95.56	95.56	100	95.97	95.97	95.97	95.56	95.97	95.56	95.56	95.56	95.56	95.56	100	95.56	95.56	95.56	95.56	95.56	95.56	95.56	95.56	95.97
I243L	100	99.59	95.85	99.59	99.59	99.59	99.18	99.18	95.88	99.59	99.59	99.59	99.18	99.59	99.18	99.18	99.18	99.18	99.18	96.3	99.18	99.18	99.18	99.18	99.18	99.18	99.18	99.18	99.59
A224L	90.62	90.62	94.12	90.62	90.62	90.62	90.62	90.18	100	90.62	90.62	90.62	90.62	90.62	90.62	90.62	90.62	90.62	90.62	100	90.62	90.62	89.29	90.62	90.62	90.62	90.62	90.62	90.62
H240R	90.83	90.83	100	90.42	90.42	90.83	90.87	90.87	89.21	90.83	90.83	90.83	90.87	90.83	90.87	90.87	90.87	90.87	90.87	89.21	90.46	90.87	87.14	90.87	90.87	90.87	90.87	89.73	90.83
A240L	100	100	81.28	95.82	89.54	100	90.25	90.25	70.45	100	100	100	90.25	100	90.25	90.25	90.25	90.25	90.25	68.51	90.25	90.25	90.25	90.25	90.25	90.25	90.25	90.25	100
H233R	100	100	93.13	97.85	98.71	100	100	100	91.42	100	100	100	100	100	100	100	100	100	100	90.99	100	100	99.57	100	100	100	100	100	100
I215L	90.23	89.77	85.45	100	91.12	90.23	90.09	90.09	86.18	90.23	89.77	90.23	90.09	90.23	90.09	90.09	90.09	90.09	90.09	86.18	90.09	90.09	90.09	90.09	90.09	90.09	90.09	90.09	90.23
K205R	93.66	93.66	100	93.17	91.22	93.66	93.66	93.66	88.04	93.66	93.66	93.66	93.66	93.66	93.66	93.66	93.66	93.66	93.66	88.04	93.66	93.66	93.66	93.66	93.66	93.66	93.66	93.66	93.66
D205R	100	100	97.56	99.02	99.02	100	100	100	94.63	100	100	100	100	99.51	100	100	100	100	100	94.63	100	100	100	100	100	100	100	100	100
CP204L	97.42	96.91	87.5	97.85	96.91	97.42	99.48	100	86.07	97.42	97.55	97.42	100	97.42	99.48	99.48	99.48	99.48	99.48	86.07	99.48	99.48	99.48	99.48	99.48	99.48	99.48	98.48	98.04
E199L	93.37	92.86	94.9	94.9	95.41	93.37	94.39	94.39	100	93.37	92.86	94.39	94.39	93.37	94.39	94.39	93.88	94.39	94.39	100	93.88	94.39	93.88	93.88	94.39	94.39	94.39	94.39	94.39
E184L	100	100	98.91	99.46	98.91	100	99.46	99.46	98.91	100	100	100	99.46	100	99.46	99.46	99.46	98.91	99.46	98.37	99.46	99.46	99.46	99.46	99.46	99.46	99.46	99.46	100
S183L	100	100	92.9	97.81	96.17	100	99.45	99.45	92.9	100	100	100	99.45	100	99.45	99.45	99.45	99.45	99.45	92.9	99.45	99.45	99.45	99.45	99.45	99.45	99.45	99.45	100
A179L	100	99.44	96.09	98.32	98.32	99.44	99.44	99.44	93.85	99.44	99.44	99.44	99.23	99.44	99.44	99.44	99.44	99.44	99.44	93.85	99.44	99.44	99.44	99.44	99.44	99.44	99.44	99.44	99.44
B175L	100	100	94.86	99.43	98.29	100	99.43	99.43	93.14	100	100	100	99.43	100	99.43	99.43	99.43	99.43	99.43	93.14	99.43	99.43	99.43	99.43	99.43	99.43	99.43	99.43	100
H171R	95.32	95.32	100	95.91	94.15	95.32	95.91	95.91	92.57	95.32	95.32	95.32	95.91	95.32	95.91	95.91	95.91	95.91	95.91	92	95.91	95.91	95.91	95.91	95.91	95.91	95.91	95.91	95.32
B169L	100	100	93.41	97.63	96.45	100	98.17	98.17	93.08	100	100	100	98.17	100	98.17	98.17	98.17	98.17	98.17	93.08	98.17	98.17	98.17	98.17	98.17	98.17	98.17	98.17	100
E183L	83.66	83.66	64.38	92.81	100	83.66	86.36	86.36	71.61	83.66	83.66	83.01	86.36	83.66	86.36	86.36	86.36	86.36	86.36	71.61	86.36	86.36	85.71	86.36	86.36	86.36	86.36	86.36	83.66
E165R	100	100	93.83	98.79	98.79	100	99.39	99.39	95.76	100	100	100	99.39	100	99.39	99.39	99.39	99.39	99.39	95.76	99.39	99.39	99.39	99.39	99.39	99.39	99.39	99.39	100
F165R	96.18	96.18	100	97.45	97.79	96.18	98.09	98.09	96.82	96.18	96.18	96.18	98.53	96.18	98.09	98.09	98.09	98.09	98.09	96.82	98.09	98.09	97.45	98.09	98.09	98.09	98.09	98.09	96.18
EP152R	100	100	92.05	95.33	96.71	100	97.37	97.37	87.29	100	100	100	97.37	100	97.37	97.37	97.37	97.37	97.37	87.29	97.37	97.37	97.37	97.37	97.37	97.37	97.37	97.37	100
C147L	99.32	97.96	100	99.32	100	88.28	98.64	98.64	97.96	99.32	98.64	99.32	98.64	99.32	98.64	98.64	98.64	98.64	98.64	97.96	98.64	98.64	98.64	98.64	98.64	98.64	98.64	98.64	99.32
E146L	100	100	95.89	99.32	98.63	100	98.63	98.63	92.47	100	100	100	98.63	100	98.63	98.63	98.63	98.63	98.63	92.47	98.63	98.63	98.63	98.63	98.63	98.63	98.63	98.63	100
K145R	100	100	97.93	99.31	100	100	100	100	96.55	100	100	100	100	99.31	100	100	99.31	99.31	99.31	96.55	100	100	97.93	100	100	100	100	100	100
E120R	95	94.17	93.44	91.74	95.12	95.68	99.18	99.29	87.6	95.68	94.17	95	99.29	95	99.18	99.18	99.18	99.18	99.18	87.6	99.18	100	99.18	99.18	99.18	99.18	99.18	99.18	94.17
MGF100-2L	100	98.4	88.65	96.45	96.45	100	97.16	97.16	88.65	100	98.4	100	97.16	100	97.16	97.16	97.16	97.16	97.16	88.65	97.16	97.16	97.16	97.16	97.16	97.16	97.16	97.16	100
A137R	100	100	90.51	94.16	93.43	100	99.27	99.27	85.4	100	100	100	99.27	100	99.27	99.27	99.27	99.27	99.27	85.4	99.27	99.27	99.27	99.27	99.27	99.27	99.27	99.27	100
C129R	100	100	94.57	95.35	96.9	100	99.22	99.22	93.8	100	100	100	99.22	100	99.22	99.22	99.22	99.22	99.22	94.57	99.22	99.22	99.22	99.22	99.22	99.22	99.22	99.22	100
hypothetical protein F8221_gp099	100	100	94.23	95.9	97.54	100	99.18	99.18	86.78	100	100	100	99.18	100	99.18	99.18	99.18	99.18	99.18	86.78	99.18	99.18	99.18	99.18	99.18	99.18	99.18	99.18	100
H124R	95.16	95.16	95.16	95.97	95.97	95.16	95.16	95.16	100	95.16	95.16	95.16	95.16	95.16	95.16	95.16	95.16	95.16	95.16	100	95.16	95.16	95.16	95.16	95.16	95.16	95.16	95.16	95.16
CP123L	100	100	97.12	95.93	96.75	100	97.54	97.54	92.68	100	100	100	97.54	100	97.54	97.54	97.54	97.54	97.54	92.68	97.54	97.54	97.54	97.54	97.54	97.54	97.54	97.54	100
B119L	100	99.16	93.28	97.48	97.48	100	100	100	94.96	100	99.16	100	100	100	100	100	100	100	100	94.96	100	100	100	100	100	100	100	100	100
D117L	100	100	89.74	94.87	99.15	100	95.73	95.73	91.45	100	100	100	95.73	100	94.87	95.73	95.73	95.73	95.73	91.45	95.73	95.73	95.73	95.73	95.73	95.73	95.73	95.73	100
H108R	96.3	96.3	100	95.37	96.3	96.3	94.44	94.44	90.99	96.3	96.3	96.3	94.44	96.3	94.44	94.44	94.44	94.44	94.44	90.99	94.44	94.44	94.44	94.44	94.44	94.44	94.44	94.44	96.3
K78R	100	100	70.19	92.31	95.15	98.72	100	100	87.01	100	100	100	100	100	100	100	100	100	100	88.31	100	100	100	100	100	100	100	100	100
CP80R	100	100	98.75	98.75	98.75	100	98.75	98.75	98.75	100	100	98.75	98.75	100	98.75	98.75	98.75	98.75	98.75	98.75	98.75	98.75	98.75	98.75	98.75	98.75	98.75	98.75	100
B66L	100	100	100	100	100	100	100	100	98.48	100	100	100	100	100	100	100	100	100	100	98.48	100	100	100	100	100	100	100	100	100
O61R	100	100	100	100	98.36	100	100	100	95.16	100	100	100	100	100	100	100	100	100	100	95.16	100	100	100	100	100	100	100	100	100
NP868R	100	99.77	97.24	98.96	98.85	99.07	99.54	99.54	96.77	100	99.77	99.77	100	99.88	99.54	99.54	99.54	99.54	99.54	96.66	99.54	99.42	99.54	99.54	99.54	99.54	99.54	99.54	100
P1192R	100	99.92	97.48	98.66	98.41	100	98.99	98.99	96.14	99.92	99.92	99.92	98.99	99.92	98.99	98.99	98.99	98.99	98.99	96.14	98.99	98.99	98.99	98.99	98.99	98.99	98.99	98.99	99.92
K421R	97.62	97.86	95	100	98.34	95.53	98.82	98.82	100	97.86	97.86	97.86	98.6	97.62	98.82	98.82	98.82	98.82	98.82	99.76	98.82	98.82	98.82	98.82	98.82	98.82	98.82	94.96	97.86
QP383R	95.3	95.3	91.22	100	96.64	100	94.52	94.52	88.82	95.3	95.3	95.3	94.52	95.3	94.52	94.52	94.52	94.52	94.52	88.52	94.52	94.52	94.52	94.52	94.52	94.52	94.52	94.52	95.3
A104R	100	100	100	100	100	100	100	100	100	100	100	100	100	100	100	100	100	100	100	100	100	100	100	100	100	100	100	100	100
A238L	95.38	95.38	75.73	100	96.64	95.38	81.61	81.61	74.9	95.38	95.38	95.38	81.61	95.38	81.61	81.61	81.61	81.61	81.61	74.9	81.61	100	81.61	81.61	81.61	81.61	81.61	81.61	95.38
DP238L	90.2	76.89	75.11	98.22	100	77.23	76.79	76.79	100	90.85	76.89	90.85	76.47	76.89	76.79	76.79	76.79	76.79	76.79	100	76.79	76.47	76.79	76.79	76.79	76.79	76.79	76.47	76.89
O174L	100	100	98.85	95.4	94.83	100	96.55	96.55	94.81	100	100	100	96.55	100	96.55	96.55	96.55	96.55	96.55	96.55	96.55	96.55	96.55	96.55	94.83	96.55	96.55	100	100
B602L	100	100	100	69.65	70.66	69.19	70.75	70.75	68.57	69.83	100	91.36	68.09	70.82	70.75	70.75	70.75	70.75	70.75	68.14	70.75	70.75	70.75	70.75	70.75	70.75	70.75	70.75	91.2
I329L	96.05	96.35	93.01	98.78	100	100	96.66	96.66	90.04	96.35	96.35	96.35	96.66	96.35	96.66	96.66	96.66	96.66	96.66	90.04	96.66	96.66	96.66	96.66	96.66	96.66	96.66	96.66	96.35
EP296R	100	99.66	95.27	99.32	98.65	100	97.97	97.97	94.26	99.66	99.66	99.66	100	100	97.97	97.97	97.97	97.97	97.97	94.26	97.97	97.97	97.97	97.97	97.97	97.97	97.97	97.97	99.66
I177L	93.79	93.79	81.37	97.74	93.22	93.79	100	100	69.57	93.79	93.79	93.79	100	93.79	100	100	100	100	100	69.57	100	100	100	100	100	100	100	100	93.79
I226R	100	99.56	92.48	98.23	97.35	99.56	98.23	98.23	93.36	99.56	99.56	99.56	100	99.56	98.23	98.23	98.23	98.23	98.23	92.92	98.23	98.23	98.23	98.23	98.23	98.23	98.23	98.23	99.56
A151R	91.39	92.72	78.81	92.72	100	92.05	87.42	87.42	76.67	92.05	92.72	92.05	87.42	92.05	87.42	87.42	87.42	87.42	87.42	76.67	87.42	87.42	87.42	87.42	87.42	87.42	87.42	100	92.05
MGF300-2R	100	100	100	100	95.62	100	97.5	97.5	91.25	100	100	100	88	100	97.5	97.5	97.5	97.5	97.5	91.25	97.5	97.5	96.88	97.5	97.5	97.5	97.5	91.49	100
MGF360-16R	91	91.06	100	94.17	94.17	91.06	93.75	93.75	86.93	91	91.06	93.29	91.26	100	93.75	93.75	93.75	93.75	93.75	86.93	93.75	93.75	93.75	93.75	93.75	93.75	93.75	93.75	91.06
MGF505-3R	85.71	100	86.33	84.64	85.41	85.71	85.71	85.71	100	85.71	100	85.71	85.71	85.36	85.71	85.71	85.71	85.71	85.71	100	85.71	85.36	85.71	85.71	85.71	85.71	85.71	85.71	85.71
p360-15R	77.95	100	87.92	77.22	79.32	78.35	77.22	77.22	100	78.35	100	78.35	77.22	78.35	77.22	77.22	77.22	77.22	77.22	99.22	77.22	77.22	77.22	77.22	77.22	77.22	77.22	77.22	100
K196R	100	100	92.55	96.81	97.45	100	99.49	100	91.89	100	100	100	99.49	100	99.49	99.49	99.49	99.49	99.49	91.89	99.49	99.49	99.49	99.49	99.49	99.49	99.49	99.49	100
D129L	72.87	72.87	82.67	75.19	73.85	72.87	100	100	100	98.45	98.45	98.45	100	98.45	100	100	100	100	100	0	100	100	100	100	100	100	100	100	98.45
MGF100-3L	81.82	81.82	100	80.82	80.14	81.82	100	100	84.09	81.82	81.82	81.82	100	81.82	100	100	100	100	100	84.25	100	100	100	100	100	100	100	100	81.82
B125R	100	100	97.6	100	99.2	100	100	100	98.4	100	100	100	100	100	100	100	100	100	100	98.4	100	100	100	100	100	100	100	100	100
B117L	85.47	85.47	86.67	89.29	83.74	100	86.96	86.96	100	85.47	85.47	85.47	86.96	84.62	86.96	86.96	86.96	86.96	86.96	99.2	86.96	86.96	86.96	86.96	86.96	86.96	86.96	86.96	85.47
E111R	100	100	97.3	98.2	100	100	100	100	100	100	100	100	100	100	100	100	100	100	100	95.5	100	100	100	100	100	100	100	100	99.1
C84L	63.16	63.16	65.79	63.16	64.47	63.16	63.16	100	61.54	63.16	63.16	63.16	100	63.16	63.16	63.16	63.16	63.16	63.16	61.54	63.16	63.16	100	63.16	63.16	63.16	63.16	63.16	63.16
EP364R	87.91	87.91	87.99	91.33	91.28	87.91	90.24	90.24	100	87.91	87.91	87.91	100	87.64	90.24	90.24	90.24	90.24	90.24	99.46	90.24	90.24	86.25	90.24	90.24	90.24	90.24	90.24	87.91
B438L	100	100	94.05	95.89	97.26	100	99.09	99.09	93.38	100	100	100	100	100	99.09	99.09	99.09	99.09	99.09	93.38	99.09	99.09	99.09	99.09	99.09	99.09	99.09	100	100
MGF505-1R	100	0	100	90.4	90.77	100	90.21	90.21	87.74	100	0	100	90.21	99.81	90.21	90.21	90.21	90.21	90.21	87.92	90.21	90.21	90.21	90.21	90.21	90.21	90.21	90.21	0
MGF505-2R	100	0	91.03	97.29	97.29	98.83	99.05	99.05	86.45	100	0	100	100	100	99.05	99.05	99.05	99.05	99.05	86.64	99.05	99.05	99.05	99.05	99.05	99.05	99.05	99.05	98.57
MGF505-4R	0	0	0	0	0	0	0	0	0	0	0	0	0	0	0	0	0	0	0	0	0	100	0	0	0	0	0	0	0
MGF360-4L	93.78	94.04	94.3	86.01	0	94.04	100	100	100	94.04	94.04	0	100	90.94	100	100	100	100	100	99.22	100	99.74	100	100	100	100	100	100	0
EP402R	0	0	0	0	100	0	64.17	64.17	100	0	0	0	0	0	64.17	64.17	64.17	64.17	64.17	100	64.17	0	64.17	64.17	64.17	64.17	64.17	0	0
MGF505-6R	0	0	0	0	0	0	0	0	0	0	0	0	0	0	0	0	0	0	95.71	0	0	100	0	0	0	0	0	0	0
MGF360-6L	100	0	90.4	96.53	100	100	97.6	97.6	90.4	100	0	0	97.6	99.73	97.6	97.6	97.6	97.6	97.6	88.05	97.6	97.6	97.6	97.6	97.6	97.6	97.6	97.33	0
MGF360-21R	0	0	73.55	0	0	0	0	0	65.83	0	0	0	0	0	0	0	0	0	0	100	0	0	0	0	0	0	0	0	0
MGF360-9L	96.86	96.17	78.47	77.46	96.97	96.86	100	100	75.71	96.86	96.17	96.86	100	96.86	100	100	100	100	100	75.71	100	100	100	100	100	100	100	100	0
MGF360-14L	100	0	89.92	95.8	95.52	100	98.88	98.88	89.36	100	0	100	98.88	100	98.88	98.88	98.88	98.88	98.88	89.36	98.88	98.88	98.88	98.88	98.88	98.88	98.88	98.88	0
MGF360-10L	100	0	83.66	93.82	87.36	100	87.29	89.57	75	100	0	100	89.57	100	89.57	87.29	87.29	87.29	87.29	75	87.29	87.01	87.29	87.29	87.01	87.01	87.01	0	0
MGF360-13L	100	0	86.4	91.5	92.63	100	95.75	95.75	100	100	0	100	95.75	100	95.75	95.75	95.75	95.75	95.75	84.42	95.75	95.47	95.75	95.75	95.75	95.75	95.75	0	0
MGF110-13L	0	0	61.19	100	0	0	70.22	77.74	0	0	71.74	0	77.94	0	70.22	0	77.74	77.74	77.74	100	77.74	70.48	76.56	77.74	77.74	77.74	77.74	0	0
MGF110-9L	0	82.26	0	100	97.59	0	96.55	96.55	87.93	0	82.26	0	96.55	0	96.55	0	96.55	96.55	96.55	87.59	96.55	96.55	96.55	96.55	96.55	96.55	96.55	96.55	0
MGF110-1L	83.7	83.33	86.99	87.73	87.04	83.7	89.72	88.85	100	84.07	83.7	83.7	89.8	83.7	89.8	0	89.8	89.8	89.8	99.63	89.72	89.8	88.85	89.8	89.8	89.8	89.8	89.8	83.33
MGF110-6L	0	0	0	0	0	0	100	100	0	0	0	0	100	0	100	0	100	100	100	0	100	99.51	100	100	100	100	100	100	0
MGF360-1L	0	0	0	100	0	0	0	0	0	0	0	0	0	100	0	0	0	0	0	100	0	0	0	0	0	0	0	58.76	0
Envelope protein 167	0	0	0	0	100	0	0	0	0	0	0	0	0	0	0	0	0	0	0	0	0	0	0	0	0	0	0	0	0
MGF110-12L	0	0	100	0	0	0	0	0	83.04	0	0	0	0	0	0	0	0	0	0	83.04	0	0	0	0	0	0	0	0	0
MGF110-11L	77.78	88.12	80.87	0	0	77.78	80.87	91.6	100	77.78	0	0	91.6	63.79	80.87	0	91.6	0	91.6	0	91.6	80.87	91.6	91.6	91.6	91.6	91.6	91.6	0
KP177R	98.31	98.31	81.36	94.92	95.48	98.31	100	100	80	98.31	98.31	98.31	100	98.31	100	0	100	100	100	80	100	100	100	100	100	100	100	100	98.31
Envelope protein 169	61.18	61.18	57.83	100	58.24	61.18	59.41	59.41	59.06	61.18	61.18	61.18	59.41	61.18	59.41	59.41	59.41	59.41	59.41	59.06	59.41	59.41	59.41	59.41	59.41	59.41	59.41	59.41	0
EP153R	69.28	61.95	100	76.13	66.67	69.28	81.65	60.12	100	69.28	61.95	69.28	81.65	69.28	81.65	81.65	81.65	81.65	81.65	100	81.65	0	81.65	81.65	81.65	81.65	81.65	100	69.28
MGF110-7L	0	0	80.8	87.59	100	0	91.97	91.97	100	0	0	76.32	91.97	0	91.97	0	91.97	91.97	91.97	80.29	91.97	98.08	91.97	91.97	91.97	91.97	91.97	100	0
DP402R	0	0	0	0	0	0	0	0	0	0	0	0	100	0	0	0	0	0	0	0	0	0	0	0	0	0	0	100	0
MGF110-14L	100	0	96.06	0	0	100	0	0	0	100	0	0	0	0	96.75	98.44	0	0	0	0	0	98.41	75.41	0	0	0	0	74.34	0
MGF110-8L	0	0	95.16	96.77	0	0	100	100	0	0	0	0	100	0	100	0	100	100	100	0	100	100	100	100	100	100	100	100	0
MGF100-1R	0	87.9	100	87.9	88.71	0	88.71	88.71	100	0	87.9	0	88.71	0	88.71	0	88.71	88.71	88.71	100	88.71	88.71	88.71	88.71	88.71	88.71	88.71	88.71	0
A125L	0	0	0	0	0	0	0	0	57.39	0	0	0	0	0	0	0	0	0	0	0	0	0	0	0	0	0	0	50	100
MGF110-4L	0	100	91.94	93.55	95.97	0	89.52	89.52	88.71	0	100	95.97	89.52	0	89.52	0	89.52	89.52	89.52	88.71	89.52	90.32	89.52	89.52	89.52	89.52	89.52	0	95.97
MGF110-2L	0	84.62	100	92.31	96.15	0	91.35	91.35	84.07	0	84.62	85.58	91.35	0	91.35	0	91.35	91.35	91.35	83.19	91.35	91.35	91.35	91.35	91.35	91.35	91.35	91.35	86.54
L356L	100	0	0	0	0	100	62.26	62.26	0	0	0	0	62.26	100	62.26	0	62.26	62.26	62.26	0	62.26	62.26	62.26	62.26	62.26	62.26	62.26	62.26	0
C105R	100	100	99.05	99.05	99.05	100	100	100	99.05	100	100	100	100	100	100	100	100	100	100	99.05	100	100	0	100	100	100	100	100	100
I8L	100	100	98.06	100	100	100	100	100	97.09	100	100	100	100	100	100	100	100	100	100	97.09	100	100	100	100	100	100	100	100	0
M98R	100	100	80.61	93.75	93.75	100	91.67	91.67	78.57	98.98	100	100	91.67	100	91.67	91.67	91.67	91.67	91.67	78.57	90.62	0	91.67	91.67	91.67	91.67	91.67	91.67	0
DP96R	100	100	0	84.21	78.31	100	95.83	95.83	0	100	100	100	95.83	100	95.83	95.83	95.83	95.83	95.83	0	95.83	95.83	95.83	95.83	95.83	95.83	95.83	95.83	100
I12R	0	0	50.62	0	0	0	0	0	100	0	0	0	0	0	0	0	0	0	0	100	0	0	0	0	0	0	0	0	0
L60L	77.61	77.61	100	90	100	77.61	96.15	96.15	71.74	77.61	77.61	77.61	96.15	77.61	96.15	0	96.15	96.15	96.15	71.74	96.15	96.15	96.15	96.15	96.15	96.15	96.15	96.15	89.47
I11L	0	0	0	0	100	0	0	0	0	0	0	0	0	0	0	0	0	0	0	0	0	0	0	0	0	0	0	0	0
A118R	100	100	0	0	0	100	0	0	0	100	100	100	0	100	0	0	0	0	0	0	0	0	0	0	0	0	0	0	100
MGF360-19R	0	0	0	0	0	100	100	100	0	0	0	0	100	0	100	100	100	100	100	0	100	100	100	100	100	100	100	100	0
EP84R	100	98.81	92.77	91.57	96.39	100	96.43	96.43	91.67	100	98.81	100	96.43	100	96.43	96.43	96.43	96.43	96.43	91.67	96.43	96.43	0	96.43	96.43	96.43	96.43	96.43	100
L83L	100	98.8	72.29	92.59	91.36	98.8	95.06	95.06	74.7	98.8	98.8	98.8	0	98.8	95.06	0	95.06	95.06	95.06	74.7	95.06	95.06	95.06	95.06	95.06	95.06	95.06	95.06	98.8
MGF110-5L	0	0	0	0	0	0	0	0	0	0	0	100	0	0	0	0	0	0	0	0	0	100	0	0	0	0	0	0	0
X69R	50	50	100	50	0	50	97.1	0	0	50	50	50	97.1	50	97.1	97.1	97.1	97.1	97.1	0	97.1	97.1	95.65	97.1	97.1	97.1	97.1	97.1	50
DP60R	100	0	0	100	70.83	68.97	92.59	92.59	0	75	0	75	64.62	75	64.41	64.41	64.41	64.41	64.41	0	100	64.41	92.59	92.59	92.59	64.41	64.41	64.41	75
I196L	97.47	97.47	80.47	82.43	81.76	96.97	100	100	100	97.47	97.47	97.47	83.46	97.47	100	100	100	84.25	100	100	100	84.25	100	100	100	100	100	0	97.47
D79L	100	100	92.41	98.73	97.47	100	100	100	97.47	100	100	100	0	100	100	100	100	100	100	96.2	100	100	100	100	100	100	100	100	100
DP71L	91.67	91.55	82.07	94.37	100	91.55	92.86	92.86	100	91.55	91.55	91.55	92.86	0	92.86	92.86	92.86	92.86	92.86	100	92.86	92.86	92.86	92.86	92.86	92.86	92.86	92.86	91.55
I7L	0	0	0	0	0	0	0	0	0	0	0	0	100	0	0	0	0	0	0	0	0	0	0	0	0	0	0	0	0
MGF360-2L	0	0	0	0	0	0	0	0	100	0	0	0	0	0	0	0	0	0	0	100	0	0	0	0	0	0	0	0	0
MGF360-17R	0	100	0	0	0	0	0	0	0	0	100	0	0	0	0	0	0	0	0	0	0	0	0	0	0	0	0	0	0
p01990-2L	0	0	100	0	0	0	0	0	0	0	0	0	0	0	0	0	0	0	0	60.61	0	0	0	0	0	0	0	0	0
I73R	0	0	100	100	98.61	0	97.22	97.22	0	0	0	0	97.22	0	97.22	97.22	97.22	97.22	97.22	0	97.22	97.22	97.22	97.22	97.22	97.22	97.22	97.22	0
A528R	0	0	0	0	0	0	0	0	0	0	0	100	0	100	0	0	0	0	0	0	0	0	0	0	0	0	0	0	0
C122R	0	0	0	0	0	0	0	0	0	0	0	0	0	0	0	0	0	0	0	0	0	0	100	0	0	0	0	0	0
UP60L	0	0	0	0	0	0	0	0	0	0	0	0	0	0	0	0	0	0	0	0	0	0	0	0	0	0	0	0	100
MGF360-11L	100	0	0	92.31	0	100	92.45	92.45	0	100	0	100	92.45	100	92.45	92.45	92.45	92.45	92.45	0	92.45	92.45	92.45	92.45	92.45	92.45	92.45	92.45	0
E66L	0	0	0	73.33	72.73	0	100	100	0	0	0	0	0	0	100	100	100	100	100	0	100	100	100	100	100	100	100	100	0
MGF360-7L	0	0	0	0	0	0	0	0	0	0	0	0	0	0	0	0	0	0	0	100	0	0	0	0	0	0	0	0	0
DP63R	100	0	0	0	0	0	0	0	0	0	0	0	0	0	0	0	0	0	0	0	0	0	0	0	0	0	0	0	0
DP42R	100	0	0	0	0	100	0	0	0	0	0	100	0	100	0	0	0	0	0	0	0	0	0	0	0	0	0	0	100
ASFV_G_ACD_00190	0	0	0	0	0	0	0	100	0	0	0	0	100	0	0	0	0	0	0	0	100	100	0	0	100	100	100	100	0
ASFV_G_ACD_00290	0	0	0	62.22	100	0	54.76	54.76	0	0	0	0	55.56	0	54.76	54.76	54.76	55.56	55.56	0	54.76	54.76	54.76	54.76	54.76	55.56	55.56	54.76	0
ASFV_G_ACD_00160	0	100	0	0	90.48	0	0	0	0	0	100	0	0	0	0	0	0	0	0	0	0	0	0	0	0	0	0	0	0
ASFV_G_ACD_00240	100	0	62.5	0	0	100	88.89	88.89	0	100	0	0	74.07	81.48	88.89	0	88.89	88.89	88.89	0	88.89	88.89	88.89	88.89	88.89	88.89	88.89	88.89	0
ASFV_G_ACD_00210	0	0	0	0	0	0	100	100	100	0	0	0	100	0	100	0	100	100	100	100	100	100	100	100	100	100	100	0	0
ASFV_26544_01960	0	0	0	0	0	0	0	0	0	0	0	0	0	0	0	0	0	0	0	0	0	0	0	0	0	100	100	0	0
ASFV_G_ACD_00600	0	0	80	0	0	100	0	0	0	0	0	0	0	0	0	0	0	0	0	0	0	0	0	0	0	0	0	0	0
ASFV_G_ACD_00350	0	0	0	74.42	100	0	0	0	0	0	0	100	0	0	0	0	0	0	0	0	76.74	0	0	76.74	0	0	0	0	0
hypothetical protein IM014_gp175	0	0	0	0	0	0	0	0	0	0	0	0	100	0	0	0	0	0	0	0	0	0	0	0	0	0	0	0	0
hypothetical protein IM014_gp069	0	0	0	0	0	0	100	100	0	0	0	0	100	0	100	100	100	100	100	0	100	100	100	100	100	100	100	100	0
hypothetical protein IM014_gp072	100	100	100	51.92	0	0	0	0	0	100	100	100	0	0	0	0	0	0	0	0	0	0	0	0	0	0	0	0	100
hypothetical protein IM014_gp012	0	100	0	0	0	0	0	0	0	0	100	0	0	0	0	0	0	0	0	0	0	0	0	0	0	0	0	0	0
hypothetical protein F8221_gp161	0	0	0	100	0	96.15	96.15	0	0	0	0	0	96.15	0	96.15	0	96.15	96.15	96.15	0	0	96.15	96.15	0	0	96.15	96.15	0	0
hypothetical protein IM014_gp031	80	0	0	0	0	0	100	79.31	74.38	80.34	0	0	79.13	76.86	0	0	79.31	0	79.13	91.74	79.13	0	0	79.13	79.13	79.31	79.31	0	0
hypothetical protein IM014_gp061	0	0	0	0	0	0	0	0	0	0	0	0	0	0	0	0	0	0	100	0	0	0	0	0	0	0	0	0	0
hypothetical protein IM014_gp004	0	0	0	0	0	0	0	100	0	0	0	0	0	0	0	0	0	0	0	0	0	0	0	0	0	0	0	0	0
hypothetical protein IM014_gp003	0	0	0	0	0	0	100	100	0	0	0	0	100	100	100	100	100	100	100	0	100	100	100	100	100	100	100	100	0
hypothetical protein F8221_gp213	0	0	0	0	0	0	0	0	0	0	0	0	0	100	0	0	0	0	0	0	0	0	0	0	0	0	0	0	0
hypothetical protein IM014_gp194	100	100	0	0	0	100	0	0	0	100	100	100	0	0	0	0	0	0	0	0	0	0	0	0	0	0	0	0	100
hypothetical protein IM014_gp014	0	0	0	0	0	0	0	0	0	0	0	0	0	0	0	0	0	0	0	0	0	100	0	0	0	0	0	0	0
hypothetical protein F8221_gp208	0	0	0	0	0	0	0	0	100	0	0	0	0	0	0	0	0	0	0	100	0	0	0	0	0	0	0	0	0
hypothetical protein	100	100	0	0	0	100	0	0	0	100	100	100	0	0	0	0	0	0	0	0	0	0	0	0	0	0	0	0	100
unnamed protein product	0	0	0	0	0	0	0	0	0	0	0	0	0	0	0	0	0	0	0	0	0	0	0	0	0	0	0	100	0
unnamed protein product	0	0	0	0	0	0	0	0	0	0	0	0	0	0	0	0	0	0	0	100	0	0	0	0	0	0	0	0	0
unnamed protein product	0	0	0	0	0	0	100	0	0	0	0	0	0	0	0	0	0	0	0	0	0	0	0	0	0	0	0	0	0
unnamed protein product	85.33	0	0	100	0	85.33	0	0	0	85.33	0	85.33	0	0	0	0	0	0	0	0	0	0	0	0	0	0	0	0	85.33
unnamed protein product	0	0	0	0	100	0	0	0	0	0	0	0	0	0	0	0	0	0	0	0	0	0	0	0	0	0	0	0	0
unnamed protein product	0	0	0	0	0	0	0	0	0	100	0	0	0	0	0	0	0	0	0	0	0	0	0	0	0	0	0	0	0
unnamed protein product	0	0	100	0	0	0	0	0	0	0	0	0	0	0	0	0	0	0	0	0	0	0	0	0	0	0	0	0	0
unnamed protein product	0	0	0	0	100	0	0	0	0	0	0	0	0	0	0	0	0	0	0	0	0	0	0	0	0	0	0	0	0
unnamed protein product	0	0	0	0	0	0	0	0	100	0	0	0	0	0	0	0	0	0	0	0	0	0	0	0	0	0	0	0	0
unnamed protein product	0	0	0	100	0	0	0	0	0	0	0	0	0	0	0	0	0	0	0	0	0	0	0	0	0	0	0	0	0
unnamed protein product	0	0	0	0	0	0	0	0	0	0	0	0	100	0	0	0	0	0	0	0	0	0	0	0	0	0	0	0	0
unnamed protein product	0	100	0	0	0	0	0	0	0	0	100	0	0	0	0	0	0	0	0	0	0	0	0	0	0	0	0	0	0
unnamed protein product	0	0	0	0	100	0	0	0	0	0	0	0	0	0	0	0	0	0	0	0	0	0	0	0	0	0	0	0	0
unnamed protein product	0	0	0	0	0	100	0	0	0	0	0	0	0	0	0	0	0	0	0	0	0	0	0	0	0	0	0	0	0
unnamed protein product	0	0	0	0	0	0	0	0	100	0	0	0	0	0	0	0	0	0	0	0	0	0	0	0	0	0	0	0	0
unnamed protein product	0	0	0	100	0	0	0	0	0	0	0	0	0	0	0	0	0	0	0	0	0	0	0	0	0	0	0	0	0
unnamed protein product	0	0	0	0	0	0	0	0	100	0	0	0	0	0	0	0	0	0	0	100	0	0	0	0	0	0	0	0	0
unnamed protein product	0	0	0	0	0	0	0	0	0	0	0	0	0	100	0	0	0	0	0	0	0	0	0	0	0	0	0	0	0
unnamed protein product	100	0	0	0	0	100	0	0	0	0	0	0	0	0	0	0	0	0	0	0	0	0	0	0	0	0	0	0	0
unnamed protein product	0	0	0	0	0	0	0	0	0	0	0	100	0	0	0	0	0	0	0	0	0	0	0	0	0	0	0	0	0
unnamed protein product	0	0	0	0	0	74.29	74.29	74.29	100	0	0	74.29	74.29	74.29	74.29	74.29	74.29	74.29	74.29	100	74.29	74.29	74.29	74.29	74.29	74.29	74.29	74.29	0
unnamed protein product	0	0	0	0	0	0	100	100	0	0	0	0	100	0	100	0	100	100	100	0	100	100	100	100	100	100	100	100	0
unnamed protein product	0	100	0	86.36	0	0	0	0	0	90.91	100	0	0	0	0	0	0	0	0	0	0	0	0	0	0	0	0	0	0
unnamed protein product	0	0	100	0	0	0	0	0	0	0	0	0	0	0	0	0	0	0	0	0	0	0	0	0	0	0	0	0	0
unnamed protein product	0	0	100	0	0	0	0	0	0	55.81	0	0	0	0	0	0	0	0	0	0	0	0	0	0	0	0	0	0	0
unnamed protein product	0	0	0	0	100	0	0	0	0	0	0	0	0	0	0	0	0	0	0	0	0	0	0	0	0	0	0	0	0
unnamed protein product	0	0	0	0	0	0	0	0	0	100	85.29	85.29	0	0	0	0	0	0	0	0	0	0	0	0	0	0	0	0	0
unnamed protein product	0	0	0	0	0	0	0	0	0	0	0	0	0	0	0	0	0	0	0	100	0	0	0	0	0	0	0	0	0
unnamed protein product	0	0	0	0	0	0	0	0	0	0	0	0	0	0	0	0	0	0	0	100	0	0	0	0	0	0	0	0	0
unnamed protein product	0	0	0	0	0	0	0	0	100	0	0	0	0	0	0	0	0	0	0	0	0	0	0	0	0	0	0	0	0
unnamed protein product	0	0	0	0	0	0	0	0	100	0	0	0	0	0	0	0	0	0	0	100	0	0	0	0	0	0	0	0	0
unnamed protein product	0	0	100	0	0	78.18	0	0	0	0	0	0	0	0	0	0	0	0	0	0	0	0	0	0	0	0	0	0	0
unnamed protein product	0	0	0	100	0	0	0	0	0	0	0	0	0	0	0	0	0	0	0	0	0	0	0	0	0	0	0	0	0
unnamed protein product	0	0	0	0	0	0	0	0	0	0	0	0	0	100	0	0	0	0	0	0	0	0	0	0	0	0	0	0	100
unnamed protein product	100	0	85.71	0	0	100	0	0	0	100	0	100	0	100	0	0	0	0	0	0	0	0	0	0	0	0	0	0	0
unnamed protein product	0	100	0	0	0	0	0	0	0	0	100	0	0	75.56	0	0	0	0	0	0	0	0	0	0	0	0	0	0	0
unnamed protein product	0	0	0	100	0	0	0	0	0	0	0	0	0	0	0	0	0	0	0	0	0	0	0	0	0	0	0	0	0
unnamed protein product	0	0	0	0	0	0	0	0	100	0	0	0	0	0	0	0	0	0	0	0	0	0	0	0	0	0	0	0	0
unnamed protein product	0	0	0	0	100	0	0	0	0	0	0	0	0	0	0	0	0	0	0	0	0	0	0	0	0	0	0	0	0
unnamed protein product	100	0	0	0	0	0	0	0	0	0	0	0	0	0	0	0	0	0	0	0	0	0	0	0	0	0	0	0	0
unnamed protein product	0	0	0	0	0	0	0	0	0	0	0	0	0	0	0	0	0	0	0	100	0	0	0	0	0	0	0	0	0
unnamed protein product	0	0	0	100	0	0	0	0	0	0	0	0	0	0	0	0	0	0	0	0	0	0	0	0	0	0	0	0	0
unnamed protein product	0	0	0	0	100	0	0	0	0	0	0	0	0	0	0	0	0	0	0	0	0	0	0	0	0	0	0	0	0
unnamed protein product	0	0	100	0	0	0	0	0	0	0	0	0	0	0	0	0	0	0	0	0	0	0	0	0	0	0	0	0	0
unnamed protein product	0	0	0	0	0	0	0	0	100	0	0	0	0	0	0	0	0	0	0	100	0	0	0	0	0	0	0	0	0
unnamed protein product	0	100	0	0	0	0	0	0	0	0	100	0	0	0	0	0	0	0	0	0	0	0	0	0	0	0	0	0	0
unnamed protein product	0	100	0	0	0	0	0	0	0	0	100	0	0	0	0	0	0	0	0	0	0	0	0	0	0	0	0	0	0
unnamed protein product	100	0	0	0	0	100	0	0	0	0	0	0	0	0	0	0	0	0	0	0	0	0	0	0	0	0	0	0	100
unnamed protein product	0	0	0	0	0	0	0	0	100	0	0	0	0	0	0	0	0	0	0	100	0	0	0	0	0	0	0	0	0
