# Supplementary material for: Genetic Characterization and Variation of African Swine Fever Virus China/GD/2019 Strain in Domestic Pigs
Source: Pathogens. 2022 Jan 14;11(1):97. doi: 10.3390/pathogens11010097 (PMC8780551; doi:10.3390/pathogens11010097)
Supplement: Supplementary file 1 [file pathogens-11-00097-s001.zip › Supplementary Files/Supplementary Table S2.xls]

## Sheet: China GD 2019.snp
Supplementary Table S2. SNPs distribution of China/GD/2019 compared to Estonia 2014
	Reference_China/GD/2019	Estonia 2014	ref_base<->sample_base	cdsPos:phase	proPos	ref_codon<->sample_codon	ref_aa<->sample_aa	mutate_type	ref_gene_ID	ref_gene_start	ref_gene_end	ref_gene_strand	ref_gene_product
Scaffold11_3555	A	T	A<->T	--	--	--	--	--	intergenic	--	--	--	--
Scaffold21_1004	T	A	T<->A	1900-01-02 09:02:00	19	AAA<->AAT	K<->N	nonsyn	MGF360_1a	272	1060	-	--
Scaffold21_1006	T	C	T<->C	1900-01-02 07:00:00	19	AAA<->GAA	K<->E	nonsyn	MGF360_1a	272	1060	-	--
Scaffold21_1007	A	C	A<->C	1900-01-02 06:02:00	18	AAT<->AAG	N<->K	nonsyn	MGF360_1a	272	1060	-	--
Scaffold21_1008	T	C	T<->C	1900-01-02 05:01:00	18	AAT<->AGT	N<->S	nonsyn	MGF360_1a	272	1060	-	--
Scaffold21_1014	C	T	C<->T	1900-01-01 23:01:00	16	AGT<->AAT	S<->N	nonsyn	MGF360_1a	272	1060	-	--
Scaffold21_1024	T	C	T<->C	1900-01-01 13:00:00	13	AAA<->GAA	K<->E	nonsyn	MGF360_1a	272	1060	-	--
Scaffold21_1026	C	T	C<->T	1900-01-01 11:01:00	12	AGG<->AAG	R<->K	nonsyn	MGF360_1a	272	1060	-	--
Scaffold21_1028	C	T	C<->T	1900-01-01 09:02:00	11	GCG<->GCA	A<->A	syn	MGF360_1a	272	1060	-	--
Scaffold21_1031	A	G	A<->G	1900-01-01 06:02:00	10	GGT<->GGC	G<->G	syn	MGF360_1a	272	1060	-	--
Scaffold21_1037	C	T	C<->T	1900-01-01 00:02:00	8	AAG<->AAA	K<->K	syn	MGF360_1a	272	1060	-	--
Scaffold21_1037	C	T	C<->T	1900-01-13 05:01:00	106	AGT<->AAT	S<->N	nonsyn	MGF360_1b	1033	1353	-	--
Scaffold21_1040	T	C	T<->C	1899-12-31 21:02:00	7	CAA<->CAG	Q<->Q	syn	MGF360_1a	272	1060	-	--
Scaffold21_1040	T	C	T<->C	1900-01-13 02:01:00	105	AAA<->AGA	K<->R	nonsyn	MGF360_1b	1033	1353	-	--
Scaffold21_1043	G	A	G<->A	1899-12-31 18:02:00	6	TGC<->TGT	C<->C	syn	MGF360_1a	272	1060	-	--
Scaffold21_1043	G	A	G<->A	1900-01-12 23:01:00	104	GCC<->GTC	A<->V	nonsyn	MGF360_1b	1033	1353	-	--
Scaffold21_1046	T	A	T<->A	1899-12-31 15:02:00	5	CTA<->CTT	L<->L	syn	MGF360_1a	272	1060	-	--
Scaffold21_1046	T	A	T<->A	1900-01-12 20:01:00	103	TAT<->TTT	Y<->F	nonsyn	MGF360_1b	1033	1353	-	--
Scaffold21_1053	T	G	T<->G	1899-12-31 08:01:00	3	CAG<->CCG	Q<->P	nonsyn	MGF360_1a	272	1060	-	--
Scaffold21_1053	T	G	T<->G	1900-01-12 13:00:00	101	AGG<->CGG	R<->R	syn	MGF360_1b	1033	1353	-	--
Scaffold21_1057	G	A	G<->A	1899-12-31 04:00:00	2	CAC<->TAC	H<->Y	nonsyn	MGF360_1a	272	1060	-	--
Scaffold21_1057	G	A	G<->A	1900-01-12 09:02:00	99	TGC<->TGT	C<->C	syn	MGF360_1b	1033	1353	-	--
Scaffold21_1058	C	T	C<->T	1899-12-31 03:02:00	1	GTG<->GTA	V<->V	start_mutation	MGF360_1a	272	1060	-	--
Scaffold21_1058	C	T	C<->T	1900-01-12 08:01:00	99	TGC<->TAC	C<->Y	nonsyn	MGF360_1b	1033	1353	-	--
Scaffold21_1064	A	G	A<->G	1900-01-12 02:01:00	97	ATG<->ACG	M<->T	nonsyn	MGF360_1b	1033	1353	-	--
Scaffold21_1069	G	A	G<->A	1900-01-11 21:02:00	95	GTC<->GTT	V<->V	syn	MGF360_1b	1033	1353	-	--
Scaffold21_1078	C	T	C<->T	1900-01-11 12:02:00	92	TTG<->TTA	L<->L	syn	MGF360_1b	1033	1353	-	--
Scaffold21_1081	C	G	C<->G	1900-01-11 09:02:00	91	GGG<->GGC	G<->G	syn	MGF360_1b	1033	1353	-	--
Scaffold21_1083	C	T	C<->T	1900-01-11 07:00:00	91	GGG<->AGG	G<->R	nonsyn	MGF360_1b	1033	1353	-	--
Scaffold21_1085	A	G	A<->G	1900-01-11 05:01:00	90	TTT<->TCT	F<->S	nonsyn	MGF360_1b	1033	1353	-	--
Scaffold21_1088	C	T	C<->T	1900-01-11 02:01:00	89	AGC<->AAC	S<->N	nonsyn	MGF360_1b	1033	1353	-	--
Scaffold21_1093	G	A	G<->A	1900-01-10 21:02:00	87	GAC<->GAT	D<->D	syn	MGF360_1b	1033	1353	-	--
Scaffold21_1105	T	C	T<->C	1900-01-10 09:02:00	83	GAA<->GAG	E<->E	syn	MGF360_1b	1033	1353	-	--
Scaffold21_1107	C	T	C<->T	1900-01-10 07:00:00	83	GAA<->AAA	E<->K	nonsyn	MGF360_1b	1033	1353	-	--
Scaffold21_1116	G	A	G<->A	1900-01-09 22:00:00	80	CTG<->TTG	L<->L	syn	MGF360_1b	1033	1353	-	--
Scaffold21_1127	C	T	C<->T	1900-01-09 11:01:00	76	GGT<->GAT	G<->D	nonsyn	MGF360_1b	1033	1353	-	--
Scaffold21_1132	A	G	A<->G	1900-01-09 06:02:00	74	AAT<->AAC	N<->N	syn	MGF360_1b	1033	1353	-	--
Scaffold21_1135	G	A	G<->A	1900-01-09 03:02:00	73	AAC<->AAT	N<->N	syn	MGF360_1b	1033	1353	-	--
Scaffold21_1141	C	T	C<->T	1900-01-08 21:02:00	71	CAG<->CAA	Q<->Q	syn	MGF360_1b	1033	1353	-	--
Scaffold21_1144	T	C	T<->C	1900-01-08 18:02:00	70	GTA<->GTG	V<->V	syn	MGF360_1b	1033	1353	-	--
Scaffold21_1147	A	G	A<->G	1900-01-08 15:02:00	69	GCT<->GCC	A<->A	syn	MGF360_1b	1033	1353	-	--
Scaffold21_1148	G	A	G<->A	1900-01-08 14:01:00	69	GCT<->GTT	A<->V	nonsyn	MGF360_1b	1033	1353	-	--
Scaffold21_1150	C	T	C<->T	1900-01-08 12:02:00	68	AAG<->AAA	K<->K	syn	MGF360_1b	1033	1353	-	--
Scaffold21_1162	A	G	A<->G	1900-01-08 00:02:00	64	GTT<->GTC	V<->V	syn	MGF360_1b	1033	1353	-	--
Scaffold21_1164	C	T	C<->T	1900-01-07 22:00:00	64	GTT<->ATT	V<->I	nonsyn	MGF360_1b	1033	1353	-	--
Scaffold21_1167	T	C	T<->C	1900-01-07 19:00:00	63	AAT<->GAT	N<->D	nonsyn	MGF360_1b	1033	1353	-	--
Scaffold21_1171	T	A	T<->A	1900-01-07 15:02:00	61	ACA<->ACT	T<->T	syn	MGF360_1b	1033	1353	-	--
Scaffold21_1173	T	A	T<->A	1900-01-07 13:00:00	61	ACA<->TCA	T<->S	nonsyn	MGF360_1b	1033	1353	-	--
Scaffold21_1177	A	G	A<->G	1900-01-07 09:02:00	59	GGT<->GGC	G<->G	syn	MGF360_1b	1033	1353	-	--
Scaffold21_1180	A	T	A<->T	1900-01-07 06:02:00	58	CAT<->CAA	H<->Q	nonsyn	MGF360_1b	1033	1353	-	--
Scaffold21_1182	G	C	G<->C	1900-01-07 04:00:00	58	CAT<->GAT	H<->D	nonsyn	MGF360_1b	1033	1353	-	--
Scaffold21_1186	A	G	A<->G	1900-01-07 00:02:00	56	TTT<->TTC	F<->F	syn	MGF360_1b	1033	1353	-	--
Scaffold21_1189	A	G	A<->G	1900-01-06 21:02:00	55	AGT<->AGC	S<->S	syn	MGF360_1b	1033	1353	-	--
Scaffold21_1195	T	C	T<->C	1900-01-06 15:02:00	53	ACA<->ACG	T<->T	syn	MGF360_1b	1033	1353	-	--
Scaffold21_1197	T	A	T<->A	1900-01-06 13:00:00	53	ACA<->TCA	T<->S	nonsyn	MGF360_1b	1033	1353	-	--
Scaffold21_1204	T	C	T<->C	1900-01-06 06:02:00	50	TTA<->TTG	L<->L	syn	MGF360_1b	1033	1353	-	--
Scaffold21_1213	T	G	T<->G	1900-01-05 21:02:00	47	GAA<->GAC	E<->D	nonsyn	MGF360_1b	1033	1353	-	--
Scaffold21_1214	T	C	T<->C	1900-01-05 20:01:00	47	GAA<->GGA	E<->G	nonsyn	MGF360_1b	1033	1353	-	--
Scaffold21_1215	C	T	C<->T	1900-01-05 19:00:00	47	GAA<->AAA	E<->K	nonsyn	MGF360_1b	1033	1353	-	--
Scaffold21_1220	A	C	A<->C	1900-01-05 14:01:00	45	ATA<->AGA	I<->R	nonsyn	MGF360_1b	1033	1353	-	--
Scaffold21_1225	A	T	A<->T	1900-01-05 09:02:00	43	ACT<->ACA	T<->T	syn	MGF360_1b	1033	1353	-	--
Scaffold21_1226	G	C	G<->C	1900-01-05 08:01:00	43	ACT<->AGT	T<->S	nonsyn	MGF360_1b	1033	1353	-	--
Scaffold21_1227	T	A	T<->A	1900-01-05 07:00:00	43	ACT<->TCT	T<->S	nonsyn	MGF360_1b	1033	1353	-	--
Scaffold21_1232	T	C	T<->C	1900-01-05 02:01:00	41	TAT<->TGT	Y<->C	nonsyn	MGF360_1b	1033	1353	-	--
Scaffold21_1243	T	C	T<->C	1900-01-04 15:02:00	37	CCA<->CCG	P<->P	syn	MGF360_1b	1033	1353	-	--
Scaffold21_1246	G	C	G<->C	1900-01-04 12:02:00	36	GCC<->GCG	A<->A	syn	MGF360_1b	1033	1353	-	--
Scaffold21_1261	C	T	C<->T	1900-01-03 21:02:00	31	TTG<->TTA	L<->L	syn	MGF360_1b	1033	1353	-	--
Scaffold21_314	T	C	T<->C	1900-01-31 03:02:00	249	ATA<->ATG	I<->M	nonsyn	MGF360_1a	272	1060	-	--
Scaffold21_334	T	C	T<->C	1900-01-30 07:00:00	243	AAG<->GAG	K<->E	nonsyn	MGF360_1a	272	1060	-	--
Scaffold21_352	G	A	G<->A	1900-01-29 13:00:00	237	CTA<->TTA	L<->L	syn	MGF360_1a	272	1060	-	--
Scaffold21_359	G	A	G<->A	1900-01-29 06:02:00	234	AAC<->AAT	N<->N	syn	MGF360_1a	272	1060	-	--
Scaffold21_401	A	G	A<->G	1900-01-27 12:02:00	220	TCT<->TCC	S<->S	syn	MGF360_1a	272	1060	-	--
Scaffold21_403	A	T	A<->T	1900-01-27 10:00:00	220	TCT<->ACT	S<->T	nonsyn	MGF360_1a	272	1060	-	--
Scaffold21_404	G	A	G<->A	1900-01-27 09:02:00	219	GAC<->GAT	D<->D	syn	MGF360_1a	272	1060	-	--
Scaffold21_406	C	T	C<->T	1900-01-27 07:00:00	219	GAC<->AAC	D<->N	nonsyn	MGF360_1a	272	1060	-	--
Scaffold21_409	G	A	G<->A	1900-01-27 04:00:00	218	CCA<->TCA	P<->S	nonsyn	MGF360_1a	272	1060	-	--
Scaffold21_413	G	A	G<->A	1900-01-27 00:02:00	216	TAC<->TAT	Y<->Y	syn	MGF360_1a	272	1060	-	--
Scaffold21_426	A	G	A<->G	1900-01-26 11:01:00	212	TTA<->TCA	L<->S	nonsyn	MGF360_1a	272	1060	-	--
Scaffold21_431	G	T	G<->T	1900-01-26 06:02:00	210	ATC<->ATA	I<->I	syn	MGF360_1a	272	1060	-	--
Scaffold21_434	A	T	A<->T	1900-01-26 03:02:00	209	AAT<->AAA	N<->K	nonsyn	MGF360_1a	272	1060	-	--
Scaffold21_436	T	C	T<->C	1900-01-26 01:00:00	209	AAT<->GAT	N<->D	nonsyn	MGF360_1a	272	1060	-	--
Scaffold21_439	T	C	T<->C	1900-01-25 22:00:00	208	ATA<->GTA	I<->V	nonsyn	MGF360_1a	272	1060	-	--
Scaffold21_446	C	A	C<->A	1900-01-25 15:02:00	205	TGG<->TGT	W<->C	nonsyn	MGF360_1a	272	1060	-	--
Scaffold21_447	C	T	C<->T	1900-01-25 14:01:00	205	TGG<->TAG	W<->X	nonsense	MGF360_1a	272	1060	-	--
Scaffold21_448	A	T	A<->T	1900-01-25 13:00:00	205	TGG<->AGG	W<->R	nonsyn	MGF360_1a	272	1060	-	--
Scaffold21_456	G	T	G<->T	1900-01-25 05:01:00	202	ACG<->AAG	T<->K	nonsyn	MGF360_1a	272	1060	-	--
Scaffold21_461	G	T	G<->T	1900-01-25 00:02:00	200	AGC<->AGA	S<->R	nonsyn	MGF360_1a	272	1060	-	--
Scaffold21_462	C	T	C<->T	1900-01-24 23:01:00	200	AGC<->AAC	S<->N	nonsyn	MGF360_1a	272	1060	-	--
Scaffold21_464	C	T	C<->T	1900-01-24 21:02:00	199	GCG<->GCA	A<->A	syn	MGF360_1a	272	1060	-	--
Scaffold21_469	T	G	T<->G	1900-01-24 16:00:00	198	ATA<->CTA	I<->L	nonsyn	MGF360_1a	272	1060	-	--
Scaffold21_479	C	G	C<->G	1900-01-24 06:02:00	194	GAG<->GAC	E<->D	nonsyn	MGF360_1a	272	1060	-	--
Scaffold21_518	T	C	T<->C	1900-01-22 15:02:00	181	TTA<->TTG	L<->L	syn	MGF360_1a	272	1060	-	--
Scaffold21_527	T	A	T<->A	1900-01-22 06:02:00	178	GAA<->GAT	E<->D	nonsyn	MGF360_1a	272	1060	-	--
Scaffold21_528	T	A	T<->A	1900-01-22 05:01:00	178	GAA<->GTA	E<->V	nonsyn	MGF360_1a	272	1060	-	--
Scaffold21_529	C	T	C<->T	1900-01-22 04:00:00	178	GAA<->AAA	E<->K	nonsyn	MGF360_1a	272	1060	-	--
Scaffold21_531	C	T	C<->T	1900-01-22 02:01:00	177	TGT<->TAT	C<->Y	nonsyn	MGF360_1a	272	1060	-	--
Scaffold21_532	A	G	A<->G	1900-01-22 01:00:00	177	TGT<->CGT	C<->R	nonsyn	MGF360_1a	272	1060	-	--
Scaffold21_536	A	G	A<->G	1900-01-21 21:02:00	175	AAT<->AAC	N<->N	syn	MGF360_1a	272	1060	-	--
Scaffold21_539	C	T	C<->T	1900-01-21 18:02:00	174	ATG<->ATA	M<->I	nonsyn	MGF360_1a	272	1060	-	--
Scaffold21_551	A	T	A<->T	1900-01-21 06:02:00	170	ATT<->ATA	I<->I	syn	MGF360_1a	272	1060	-	--
Scaffold21_553	T	A	T<->A	1900-01-21 04:00:00	170	ATT<->TTT	I<->F	nonsyn	MGF360_1a	272	1060	-	--
Scaffold21_566	A	G	A<->G	1900-01-20 15:02:00	165	ATT<->ATC	I<->I	syn	MGF360_1a	272	1060	-	--
Scaffold21_596	T	A	T<->A	1900-01-19 09:02:00	155	ATA<->ATT	I<->I	syn	MGF360_1a	272	1060	-	--
Scaffold21_602	T	C	T<->C	1900-01-19 03:02:00	153	ACA<->ACG	T<->T	syn	MGF360_1a	272	1060	-	--
Scaffold21_604	T	A	T<->A	1900-01-19 01:00:00	153	ACA<->TCA	T<->S	nonsyn	MGF360_1a	272	1060	-	--
Scaffold21_613	A	C	A<->C	1900-01-18 16:00:00	150	TGT<->GGT	C<->G	nonsyn	MGF360_1a	272	1060	-	--
Scaffold21_628	C	T	C<->T	1900-01-18 01:00:00	145	GCC<->ACC	A<->T	nonsyn	MGF360_1a	272	1060	-	--
Scaffold21_634	G	T	G<->T	1900-01-17 19:00:00	143	CAG<->AAG	Q<->K	nonsyn	MGF360_1a	272	1060	-	--
Scaffold21_658	T	C	T<->C	1900-01-16 19:00:00	135	AAT<->GAT	N<->D	nonsyn	MGF360_1a	272	1060	-	--
Scaffold21_659	T	C	T<->C	1900-01-16 18:02:00	134	ACA<->ACG	T<->T	syn	MGF360_1a	272	1060	-	--
Scaffold21_669	T	A	T<->A	1900-01-16 08:01:00	131	AAA<->ATA	K<->I	nonsyn	MGF360_1a	272	1060	-	--
Scaffold21_670	T	A	T<->A	1900-01-16 07:00:00	131	AAA<->TAA	K<->X	nonsense	MGF360_1a	272	1060	-	--
Scaffold21_677	A	T	A<->T	1900-01-16 00:02:00	128	ATT<->ATA	I<->I	syn	MGF360_1a	272	1060	-	--
Scaffold21_679	T	C	T<->C	1900-01-15 22:00:00	128	ATT<->GTT	I<->V	nonsyn	MGF360_1a	272	1060	-	--
Scaffold21_693	A	G	A<->G	1900-01-15 08:01:00	123	TTT<->TCT	F<->S	nonsyn	MGF360_1a	272	1060	-	--
Scaffold21_695	G	C	G<->C	1900-01-15 06:02:00	122	GTC<->GTG	V<->V	syn	MGF360_1a	272	1060	-	--
Scaffold21_697	C	A	C<->A	1900-01-15 04:00:00	122	GTC<->TTC	V<->F	nonsyn	MGF360_1a	272	1060	-	--
Scaffold21_698	G	A	G<->A	1900-01-15 03:02:00	121	AAC<->AAT	N<->N	syn	MGF360_1a	272	1060	-	--
Scaffold21_705	T	A	T<->A	1900-01-14 20:01:00	119	TAT<->TTT	Y<->F	nonsyn	MGF360_1a	272	1060	-	--
Scaffold21_709	C	A	C<->A	1900-01-14 16:00:00	118	GCT<->TCT	A<->S	nonsyn	MGF360_1a	272	1060	-	--
Scaffold21_712	C	G	C<->G	1900-01-14 13:00:00	117	GTT<->CTT	V<->L	nonsyn	MGF360_1a	272	1060	-	--
Scaffold21_722	T	A	T<->A	1900-01-14 03:02:00	113	TTA<->TTT	L<->F	nonsyn	MGF360_1a	272	1060	-	--
Scaffold21_724	A	G	A<->G	1900-01-14 01:00:00	113	TTA<->CTA	L<->L	syn	MGF360_1a	272	1060	-	--
Scaffold21_743	A	C	A<->C	1900-01-13 06:02:00	106	AGT<->AGG	S<->R	nonsyn	MGF360_1a	272	1060	-	--
Scaffold21_782	C	G	C<->G	1900-01-11 15:02:00	93	AAG<->AAC	K<->N	nonsyn	MGF360_1a	272	1060	-	--
Scaffold21_790	G	A	G<->A	1900-01-11 07:00:00	91	CTA<->TTA	L<->L	syn	MGF360_1a	272	1060	-	--
Scaffold21_809	A	G	A<->G	1900-01-10 12:02:00	84	TAT<->TAC	Y<->Y	syn	MGF360_1a	272	1060	-	--
Scaffold21_812	C	T	C<->T	1900-01-10 09:02:00	83	AGG<->AGA	R<->R	syn	MGF360_1a	272	1060	-	--
Scaffold21_820	G	A	G<->A	1900-01-10 01:00:00	81	CTA<->TTA	L<->L	syn	MGF360_1a	272	1060	-	--
Scaffold21_828	T	C	T<->C	1900-01-09 17:01:00	78	AAC<->AGC	N<->S	nonsyn	MGF360_1a	272	1060	-	--
Scaffold21_830	G	A	G<->A	1900-01-09 15:02:00	77	TTC<->TTT	F<->F	syn	MGF360_1a	272	1060	-	--
Scaffold21_841	T	C	T<->C	1900-01-09 04:00:00	74	AAT<->GAT	N<->D	nonsyn	MGF360_1a	272	1060	-	--
Scaffold21_849	G	A	G<->A	1900-01-08 20:01:00	71	ACA<->ATA	T<->I	nonsyn	MGF360_1a	272	1060	-	--
Scaffold21_857	A	G	A<->G	1900-01-08 12:02:00	68	ATT<->ATC	I<->I	syn	MGF360_1a	272	1060	-	--
Scaffold21_867	G	T	G<->T	1900-01-08 02:01:00	65	ACA<->AAA	T<->K	nonsyn	MGF360_1a	272	1060	-	--
Scaffold21_869	A	T	A<->T	1900-01-08 00:02:00	64	GAT<->GAA	D<->E	nonsyn	MGF360_1a	272	1060	-	--
Scaffold21_872	T	A	T<->A	1900-01-07 21:02:00	63	CTA<->CTT	L<->L	syn	MGF360_1a	272	1060	-	--
Scaffold21_876	T	C	T<->C	1900-01-07 17:01:00	62	GAA<->GGA	E<->G	nonsyn	MGF360_1a	272	1060	-	--
Scaffold21_878	A	C	A<->C	1900-01-07 15:02:00	61	GGT<->GGG	G<->G	syn	MGF360_1a	272	1060	-	--
Scaffold21_880	C	T	C<->T	1900-01-07 13:00:00	61	GGT<->AGT	G<->S	nonsyn	MGF360_1a	272	1060	-	--
Scaffold21_882	A	T	A<->T	1900-01-07 11:01:00	60	TTT<->TAT	F<->Y	nonsyn	MGF360_1a	272	1060	-	--
Scaffold21_886	T	C	T<->C	1900-01-07 07:00:00	59	ATT<->GTT	I<->V	nonsyn	MGF360_1a	272	1060	-	--
Scaffold21_888	C	A	C<->A	1900-01-07 05:01:00	58	AGA<->ATA	R<->I	nonsyn	MGF360_1a	272	1060	-	--
Scaffold21_893	T	A	T<->A	1900-01-07 00:02:00	56	AAA<->AAT	K<->N	nonsyn	MGF360_1a	272	1060	-	--
Scaffold21_894	T	C	T<->C	1900-01-06 23:01:00	56	AAA<->AGA	K<->R	nonsyn	MGF360_1a	272	1060	-	--
Scaffold21_898	G	A	G<->A	1900-01-06 19:00:00	55	CTG<->TTG	L<->L	syn	MGF360_1a	272	1060	-	--
Scaffold21_900	T	C	T<->C	1900-01-06 17:01:00	54	CAA<->CGA	Q<->R	nonsyn	MGF360_1a	272	1060	-	--
Scaffold21_901	G	T	G<->T	1900-01-06 16:00:00	54	CAA<->AAA	Q<->K	nonsyn	MGF360_1a	272	1060	-	--
Scaffold21_902	A	C	A<->C	1900-01-06 15:02:00	53	GCT<->GCG	A<->A	syn	MGF360_1a	272	1060	-	--
Scaffold21_903	G	T	G<->T	1900-01-06 14:01:00	53	GCT<->GAT	A<->D	nonsyn	MGF360_1a	272	1060	-	--
Scaffold21_905	A	T	A<->T	1900-01-06 12:02:00	52	AAT<->AAA	N<->K	nonsyn	MGF360_1a	272	1060	-	--
Scaffold21_906	T	A	T<->A	1900-01-06 11:01:00	52	AAT<->ATT	N<->I	nonsyn	MGF360_1a	272	1060	-	--
Scaffold21_912	A	T	A<->T	1900-01-06 05:01:00	50	CTA<->CAA	L<->Q	nonsyn	MGF360_1a	272	1060	-	--
Scaffold21_921	G	A	G<->A	1900-01-05 20:01:00	47	CCC<->CTC	P<->L	nonsyn	MGF360_1a	272	1060	-	--
Scaffold21_928	C	T	C<->T	1900-01-05 13:00:00	45	GAT<->AAT	D<->N	nonsyn	MGF360_1a	272	1060	-	--
Scaffold21_932	T	A	T<->A	1900-01-05 09:02:00	43	TTA<->TTT	L<->F	nonsyn	MGF360_1a	272	1060	-	--
Scaffold21_935	T	C	T<->C	1900-01-05 06:02:00	42	TTA<->TTG	L<->L	syn	MGF360_1a	272	1060	-	--
Scaffold21_943	G	T	G<->T	1900-01-04 22:00:00	40	CAT<->AAT	H<->N	nonsyn	MGF360_1a	272	1060	-	--
Scaffold21_944	G	A	G<->A	1900-01-04 21:02:00	39	TGC<->TGT	C<->C	syn	MGF360_1a	272	1060	-	--
Scaffold21_945	C	T	C<->T	1900-01-04 20:01:00	39	TGC<->TAC	C<->Y	nonsyn	MGF360_1a	272	1060	-	--
Scaffold21_949	G	A	G<->A	1900-01-04 16:00:00	38	CTA<->TTA	L<->L	syn	MGF360_1a	272	1060	-	--
Scaffold21_973	C	G	C<->G	1900-01-03 16:00:00	30	GTT<->CTT	V<->L	nonsyn	MGF360_1a	272	1060	-	--
Scaffold21_981	A	G	A<->G	1900-01-03 08:01:00	27	GTA<->GCA	V<->A	nonsyn	MGF360_1a	272	1060	-	--
Scaffold21_982	C	T	C<->T	1900-01-03 07:00:00	27	GTA<->ATA	V<->I	nonsyn	MGF360_1a	272	1060	-	--
Scaffold21_983	A	T	A<->T	1900-01-03 06:02:00	26	AAT<->AAA	N<->K	nonsyn	MGF360_1a	272	1060	-	--
Scaffold21_997	C	G	C<->G	1900-01-02 16:00:00	22	GAA<->CAA	E<->Q	nonsyn	MGF360_1a	272	1060	-	--
Scaffold25_436	G	T	G<->T	1900-01-30 02:01:00	241	ACT<->AAT	T<->N	nonsyn	MGF360_6L	30	1157	-	--
Scaffold2_17633	T	A	T<->A	--	--	--	--	--	intergenic	--	--	--	--
Scaffold33_1027	A	C	A<->C	--	--	--	--	--	intergenic	--	--	--	--
Scaffold4_2873	C	T	C<->T	1900-01-18 10:00:00	148	GCA<->ACA	A<->T	nonsyn	A859L	738	3314	-	--
Scaffold4_4747	T	A	T<->A	1900-01-30 21:02:00	247	CGA<->CGT	R<->R	syn	F317L	4534	5487	-	--
