# Supplementary material for: Genetic Characterization and Variation of African Swine Fever Virus China/GD/2019 Strain in Domestic Pigs
Source: Pathogens. 2022 Jan 14;11(1):97. doi: 10.3390/pathogens11010097 (PMC8780551; doi:10.3390/pathogens11010097)
Supplement: Supplementary file 1 [file pathogens-11-00097-s001.zip › Supplementary Files/Supplementary Table S3.xls]

Supplementary Table S3. SNPs distribution of China/GD/2019 compared to 7 genotype II strains
	Reference_China/GD/2019	ASFV_Belgium_2018/1	ref_base<->sample_base	cdsPos:phase	proPos	ref_codon<->sample_codon	ref_aa<->sample_aa	mutate_type	ref_gene_ID	ref_gene_start	ref_gene_end	ref_gene_strand	ref_gene_product
Scaffold11_3555	A	T	A<->T	--	--	--	--	--	intergenic	--	--	--	--
Scaffold25_436	G	T	G<->T	722:01:00	241	ACT<->AAT	T<->N	nonsyn	MGF_360-6L	30	1157	-	--
Scaffold2_11928	C	T	C<->T	251:01:00	84	CCT<->CTT	P<->L	nonsyn	D117L	11678	12031	+	--
Scaffold2_17633	T	A	T<->A	--	--	--	--	--	intergenic	--	--	--	--
Scaffold33_1027	A	C	A<->C	--	--	--	--	--	intergenic	--	--	--	--
Scaffold4_4747	T	A	T<->A	741:02:00	247	CGA<->CGT	R<->R	syn	F317L	4534	5487	-	--
	Reference_China/GD/2019	Pol16_20186_o7	ref_base<->sample_base	cdsPos:phase	proPos	ref_codon<->sample_codon	ref_aa<->sample_aa	mutate_type	ref_gene_ID	ref_gene_start	ref_gene_end	ref_gene_strand	ref_gene_product
Scaffold11_3555	A	T	A<->T	--	--	--	--	--	intergenic	--	--	--	--
Scaffold16_1264	G	A	G<->A	988:00:00	330	GTT<->ATT	V<->I	nonsyn	MGF_505-4R	277	1773	+	--
Scaffold25_436	G	T	G<->T	722:01:00	241	ACT<->AAT	T<->N	nonsyn	MGF_360-6L	30	1157	-	--
Scaffold2_17633	T	A	T<->A	--	--	--	--	--	intergenic	--	--	--	--
Scaffold33_1027	A	C	A<->C	--	--	--	--	--	intergenic	--	--	--	--
Scaffold4_14709	C	A	C<->A	434:01:00	145	TCC<->TAC	S<->Y	nonsyn	K145R	14276	14713	+	--
Scaffold4_4747	T	A	T<->A	741:02:00	247	CGA<->CGT	R<->R	syn	F317L	4534	5487	-	--
Scaffold5_10027	C	T	C<->T	364:00:00	122	GAA<->AAA	E<->K	nonsyn	E199L	9800	10390	-	--
	Reference_China/GD/2019	Pol16_29413_o23	ref_base<->sample_base	cdsPos:phase	proPos	ref_codon<->sample_codon	ref_aa<->sample_aa	mutate_type	ref_gene_ID	ref_gene_start	ref_gene_end	ref_gene_strand	ref_gene_product
Scaffold11_3555	A	T	A<->T	--	--	--	--	--	intergenic	--	--	--	--
Scaffold16_1264	G	A	G<->A	988:00:00	330	GTT<->ATT	V<->I	nonsyn	MGF_505-4R	277	1773	+	--
Scaffold25_436	G	T	G<->T	722:01:00	241	ACT<->AAT	T<->N	nonsyn	MGF_360_6L	30	1157	-	--
Scaffold2_17633	T	A	T<->A	--	--	--	--	--	intergenic	--	--	--	--
Scaffold33_1027	A	C	A<->C	--	--	--	--	--	intergenic	--	--	--	--
Scaffold4_14709	C	A	C<->A	434:01:00	145	TCC<->TAC	S<->Y	nonsyn	K145R	14276	14713	+	--
Scaffold4_4747	T	A	T<->A	741:02:00	247	CGA<->CGT	R<->R	syn	F317L	4534	5487	-	--
Scaffold5_5780	C	T	C<->T	354:02:00	118	ATG<->ATA	M<->I	nonsyn	E184L	5579	6133	-	--
	Reference_China/GD/2019	Pol17_05838_C220	ref_base<->sample_base	cdsPos:phase	proPos	ref_codon<->sample_codon	ref_aa<->sample_aa	mutate_type	ref_gene_ID	ref_gene_start	ref_gene_end	ref_gene_strand	ref_gene_product
Scaffold11_3555	A	T	A<->T	--	--	--	--	--	intergenic	--	--	--	--
Scaffold16_1264	G	A	G<->A	988:00:00	330	GTT<->ATT	V<->I	nonsyn	MGF_505-4R	277	1773	+	--
Scaffold25_436	G	T	G<->T	722:01:00	241	ACT<->AAT	T<->N	nonsyn	MGF_360_6L	30	1157	-	--
Scaffold2_17633	T	A	T<->A	--	--	--	--	--	intergenic	--	--	--	--
Scaffold33_1027	A	C	A<->C	--	--	--	--	--	intergenic	--	--	--	--
Scaffold4_14709	C	A	C<->A	434:01:00	145	TCC<->TAC	S<->Y	nonsyn	K145R	14276	14713	+	--
Scaffold4_4747	T	A	T<->A	741:02:00	247	CGA<->CGT	R<->R	syn	F317L	4534	5487	-	--
	Reference_China/GD/2019	China/2018/AnhuiXCGQ	ref_base<->sample_base	cdsPos:phase	proPos	ref_codon<->sample_codon	ref_aa<->sample_aa	mutate_type	ref_gene_ID	ref_gene_start	ref_gene_end	ref_gene_strand	ref_gene_product
Scaffold11_136	C	T	C<->T	--	--	--	--	--	intergenic	--	--	--	--
Scaffold11_32	C	T	C<->T	--	--	--	--	--	intergenic	--	--	--	--
Scaffold11_3555	A	T	A<->T	--	--	--	--	--	intergenic	--	--	--	--
Scaffold25_436	G	T	G<->T	722:01:00	241	ACT<->AAT	T<->N	nonsyn	MGF_360_6L	30	1157	-	--
Scaffold2_17633	T	A	T<->A	--	--	--	--	--	intergenic	--	--	--	--
Scaffold33_1027	A	C	A<->C	--	--	--	--	--	intergenic	--	--	--	--
Scaffold4_4747	T	A	T<->A	741:02:00	247	CGA<->CGT	R<->R	syn	F317L	4534	5487	-	--
	Reference_China/GD/2019	China/Pig/HLJ/2018	ref_base<->sample_base	cdsPos:phase	proPos	ref_codon<->sample_codon	ref_aa<->sample_aa	mutate_type	ref_gene_ID	ref_gene_start	ref_gene_end	ref_gene_strand	ref_gene_product
Scaffold11_3555	A	T	A<->T	--	--	--	--	--	intergenic	--	--	--	--
Scaffold25_436	G	T	G<->T	722:01:00	241	ACT<->AAT	T<->N	nonsyn	MGF_360_6L	30	1157	-	--
Scaffold2_17633	T	A	T<->A	--	--	--	--	--	intergenic	--	--	--	--
Scaffold33_1027	A	C	A<->C	--	--	--	--	--	intergenic	--	--	--	--
Scaffold4_4747	T	A	T<->A	741:02:00	247	CGA<->CGT	R<->R	syn	F317L	4534	5487	-	--
	Reference_China/GD/2019	China/DB/LN/2018	ref_base<->sample_base	cdsPos:phase	proPos	ref_codon<->sample_codon	ref_aa<->sample_aa	mutate_type	ref_gene_ID	ref_gene_start	ref_gene_end	ref_gene_strand	ref_gene_product
Scaffold11_3555	A	T	A<->T	--	--	--	--	--	intergenic	--	--	--	--
Scaffold25_436	G	T	G<->T	722:01:00	241	ACT<->AAT	T<->N	nonsyn	MGF_360_6L	30	1157	-	--
Scaffold2_17633	T	A	T<->A	--	--	--	--	--	intergenic	--	--	--	--
Scaffold33_1027	A	C	A<->C	--	--	--	--	--	intergenic	--	--	--	--
Scaffold4_4747	T	A	T<->A	741:02:00	247	CGA<->CGT	R<->R	syn	F317L	4534	5487	-	--
